# Supplementary material
Source: ML conference proceedings conference paper supplement (https://openreview.net/forum?id=lEf52hTHq0Q)
Supplement: supplementary_material [file attachment]

## A Auxiliary lemmas

In this section, we introduce auxiliary lemmas that are necessary for our proofs.

**Lemma 10** ([21, Lemma 19]). *If  $f(\cdot)$  is  $\ell$ -smooth and  $\rho$ -Hessian Lipschitz,  $\eta = 1/\ell$ , then the gradient descent sequence  $\{\mathbf{x}_t\}$  obtained by  $\mathbf{x}_{t+1} := \mathbf{x}_t - \eta \nabla f(\mathbf{x}_t)$  satisfies:*

$$f(\mathbf{x}_{t+1}) - f(\mathbf{x}_t) \leq \eta \|\nabla f(\mathbf{x})\|^2 / 2, \quad (37)$$

for any step  $t$  in which Negative Curvature Finding is not called.

**Lemma 11** ([21, Lemma 23]). *For a  $\ell$ -smooth and  $\rho$ -Hessian Lipschitz function  $f$  with its stochastic gradient satisfying [Assumption 1](#), there exists an absolute constant  $c$  such that, for any fixed  $t, t_0, \iota > 0$ , with probability at least  $1 - 4e^{-\iota}$ , the stochastic gradient descent sequence in [Algorithm 8](#) satisfies:*

$$f(\mathbf{x}_{t_0+t}) - f(\mathbf{x}_{t_0}) \leq -\frac{\eta}{8} \sum_{i=0}^{t-1} \|\nabla f(\mathbf{x}_{t_0+i})\|^2 + c \cdot \frac{\sigma^2}{\ell} (t + \iota), \quad (38)$$

if during  $t_0 \sim t_0 + t$ , Stochastic Negative Curvature Finding has not been called.

**Lemma 12** ([21, Lemma 29]). *Denote  $\alpha(t) := \left[ \sum_{\tau=0}^{t-1} (1 + \eta\gamma)^{2(t-1-\tau)} \right]^{1/2}$  and  $\beta(t) := (1 + \eta\gamma)^t / \sqrt{2\eta\gamma}$ . If  $\eta\gamma \in [0, 1]$ , then we have*

1.  $\alpha(t) \leq \beta(t)$  for any  $t \in \mathbb{N}$ ;
2.  $\alpha(t) \geq \beta(t)/\sqrt{3}$ ,  $\forall t \geq \ln 2/(\eta\gamma)$ .

**Lemma 13** ([21, Lemma 30]). *Under the notation of [Lemma 12](#) and [Appendix D.1](#), letting  $-\gamma := \lambda_{\min}(\tilde{\mathcal{H}})$ , for any  $0 \leq t \leq \mathcal{T}_s$  and  $\iota > 0$  we have*

$$\Pr \left( \|\mathbf{q}_p(t)\| \leq \beta(t) \eta r_s \cdot \sqrt{\iota} \right) \geq 1 - 2e^{-\iota}, \quad (39)$$

and

$$\Pr \left( \|\mathbf{q}_p(t)\| \geq \frac{\beta(t) \eta r_s}{10\sqrt{n}} \cdot \frac{\delta}{\mathcal{T}_s} \right) \geq 1 - \frac{\delta}{\mathcal{T}_s}, \quad (40)$$

$$\Pr \left( \|\mathbf{q}_p(t)\| \geq \frac{\beta(t) \eta r_s}{10\sqrt{n}} \cdot \delta \right) \geq 1 - \delta. \quad (41)$$

**Lemma 14** ([21, Lemma 37]). *Given i.i.d.  $\mathbf{X}_1, \dots, \mathbf{X}_\tau \in \mathbb{R}^n$  all being zero-mean  $nSG(\sigma_i)$ , then for any  $\iota > 0$ , and  $B > b > 0$ , there exists an absolute constant  $c$  such that, with probability at least  $1 - 2n \log(B/b) \cdot e^{-\iota}$ :*

$$\sum_{i=1}^n \sigma_i^2 \geq B \quad \text{or} \quad \left\| \sum_{i=1}^{\tau} \mathbf{X}_i \right\| \leq c \cdot \sqrt{\max \left\{ \sum_{i=1}^{\tau} \sigma_i^2, b \right\}} \cdot \iota. \quad (42)$$

The next two lemmas are frequently used in the large gradient scenario of the accelerated gradient descent method:

**Lemma 15** ([22, Lemma 7]). *Consider the setting of [Theorem 21](#), define a new parameter*

$$\tilde{\mathcal{T}} := \frac{\sqrt{\ell}}{(\rho\epsilon)^{1/4}} \cdot c_A, \quad (43)$$

for some large enough constant  $c_A$ . *If  $\|\nabla f(\mathbf{x}_\tau)\| \geq \epsilon$  for all  $\tau \in [0, \tilde{\mathcal{T}}]$ , then there exists a large enough positive constant  $c_{A0}$ , such that if we choose  $c_A \geq c_{A0}$ , by running [Algorithm 2](#) we have  $E_{\tilde{\mathcal{T}}} - E_0 \leq -\mathcal{E}$ , in which  $\mathcal{E} = \sqrt{\frac{\epsilon^3}{\rho}} \cdot c_A^{-7}$ , and  $E_\tau$  is defined as:*

$$E_\tau := f(\mathbf{x}_\tau) + \frac{1}{2\eta} \|\mathbf{v}_\tau\|^2. \quad (44)$$

**Lemma 16** ([22, Lemma 4 and Lemma 5]). *Assume that the function  $f$  is  $\ell$ -smooth. Consider the setting of [Theorem 21](#), for every iteration that is not within  $\mathcal{T}'$  steps after uniform perturbation, we have:*

$$E_{\tau+1} \leq E_\tau, \quad (45)$$

where  $E_\tau$  is defined in (44) in [Lemma 15](#).

## B Proof details of negative curvature finding by gradient descent

### B.1 Proof of Lemma 17

**Lemma 17.** Under the setting of Proposition 3, we use  $\alpha_t$  to denote

$$\alpha_t = \|\mathbf{y}_{t,\parallel}\|/\|\mathbf{y}_t\|, \quad (46)$$

where  $\mathbf{y}_{t,\parallel}$  is the component of  $\mathbf{y}_t$  in the subspace  $\mathfrak{S}_{\parallel}$  spanned by  $\{\mathbf{u}_1, \mathbf{u}_2, \dots, \mathbf{u}_p\}$ . Then, during all the  $\mathcal{T}$  iterations of Algorithm 1, we have  $\alpha_t \geq \alpha_{\min}$  for

$$\alpha_{\min} = \frac{\delta_0}{4} \sqrt{\frac{\pi}{n}}, \quad (47)$$

given that  $\alpha_0 \geq \sqrt{\frac{\pi}{n}} \delta_0$ .

*Proof.* In this proof, we consider the worst case, where the initial value  $\alpha_0 = \sqrt{\frac{\pi}{n}} \delta_0$  and the component  $y_{0,1}$  along  $\mathbf{u}_1$  equals 0. Also, the eigenvalues satisfy

$$\lambda_2 = \lambda_3 = \dots = \lambda_p = -\sqrt{\rho\epsilon}, \quad \lambda_{p+1} = \lambda_{p+2} = \dots = \lambda_{n-1} = -\sqrt{\rho\epsilon} + \nu, \quad (48)$$

for an arbitrarily small positive constant  $\nu$ , which can make components of  $\mathbf{y}_t$  in  $\mathfrak{S}_{\perp}$  as large as possible to make  $\alpha_t$  smaller. Out of the same reason, we assume that each time we make a gradient call at point  $\mathbf{x}$ , the derivation term  $\Delta$  from pure quadratic approximation

$$\Delta = \nabla h_f(\mathbf{x}) - \mathcal{H}(\mathbf{0})\mathbf{x}, \quad (49)$$

lies in the direction that can make  $\alpha_t$  as small as possible. Then, the component  $\Delta_{\parallel}$  in  $\mathfrak{S}_{\parallel}$  should be in the opposite direction to  $\mathbf{x}_{\parallel}$ , and the component  $\Delta_{\perp}$  in  $\mathfrak{S}_{\perp}$  should be in the direction of  $\mathbf{x}_{\perp}$ . Hence in this case, we have  $\|\mathbf{y}_{t,\perp}\|/\|\mathbf{y}_t\|$  being non-decreasing, since  $\nu$  can be arbitrarily small. Also, it admits the following recurrence formula:

$$\|\mathbf{y}_{t+1,\perp}\| = (1 + (\sqrt{\rho\epsilon} - \nu)/\ell) \|\mathbf{y}_{t,\perp}\| + \|\Delta_{\perp}\|/\ell \quad (50)$$

$$\leq (1 + \sqrt{\rho\epsilon}/\ell) \|\mathbf{y}_{t,\perp}\| + \|\Delta\|/\ell \quad (51)$$

$$\leq \left(1 + \sqrt{\rho\epsilon}/\ell + \frac{\|\Delta\|}{\ell \|\mathbf{y}_{t,\perp}\|}\right) \|\mathbf{y}_{t,\perp}\|, \quad (52)$$

where the second inequality is due to the fact that  $\nu$  can be an arbitrarily small positive number. Note that since  $\|\mathbf{y}_{t,\perp}\|/\|\mathbf{y}_t\|$  is non-decreasing in this worst-case scenario, we have

$$\frac{\|\Delta\|}{\|\mathbf{y}_{t,\perp}\|} \leq \frac{\|\Delta\|}{\|\mathbf{y}_t\|} \cdot \frac{\|\mathbf{y}_0\|}{\|\mathbf{y}_{0,\perp}\|} \leq \frac{2\|\Delta\|}{\|\mathbf{y}_t\|} \leq 2\rho r, \quad (53)$$

which leads to

$$\|\mathbf{y}_{t+1,\perp}\| \leq (1 + \sqrt{\rho\epsilon}/\ell + 2\rho r/\ell) \|\mathbf{y}_{t,\perp}\|. \quad (54)$$

On the other hand, suppose for some value  $t$ , we have  $\alpha_k \geq \alpha_{\min}$  with any  $1 \leq k \leq t$ . Then,

$$\|\mathbf{y}_{t+2,\parallel}\| = (1 + \sqrt{\rho\epsilon}/\ell) \|\mathbf{y}_{t+1,\parallel}\| - \|\Delta_{\parallel}\|/\ell \quad (55)$$

$$\geq \left(1 + \sqrt{\rho\epsilon}/\ell - \frac{\|\Delta\|}{\ell \|\mathbf{y}_{t,\parallel}\|}\right) \|\mathbf{y}_{t,\parallel}\|. \quad (56)$$

Note that since  $\|\mathbf{y}_{t,\parallel}\|/\|\mathbf{y}_t\| \geq \alpha_{\min}$ , we have

$$\frac{\|\Delta\|}{\|\mathbf{y}_{t,\parallel}\|} \geq \frac{\|\Delta\|}{\alpha_{\min} \|\mathbf{y}_t\|} = \rho r / \alpha_{\min}, \quad (57)$$

which leads to

$$\|\mathbf{y}_{t+1,\parallel}\| \geq (1 + \sqrt{\rho\epsilon}/\ell - \rho r / (\alpha_{\min} \ell)) \|\mathbf{y}_{t,\parallel}\|. \quad (58)$$

Then we can observe that

$$\frac{\|\mathbf{y}_{t,\parallel}\|}{\|\mathbf{y}_{t,\perp}\|} \geq \frac{\|\mathbf{y}_{0,\parallel}\|}{\|\mathbf{y}_{0,\perp}\|} \cdot \left( \frac{1 + \sqrt{\rho\epsilon}/\ell - \rho r / (\alpha_{\min} \ell)}{1 + \sqrt{\rho\epsilon}/\ell + 2\rho r/\ell} \right)^t, \quad (59)$$

where

$$\frac{1 + \sqrt{\rho\epsilon}/\ell - \rho r / (\alpha_{\min} \ell)}{1 + \sqrt{\rho\epsilon}/\ell + 2\rho r/\ell} \geq (1 + \sqrt{\rho\epsilon}/\ell - \rho r / (\alpha_{\min} \ell))(1 - \sqrt{\rho\epsilon}/\ell - 2\rho r/\ell) \quad (60)$$

$$\geq 1 - \rho\epsilon/\ell^2 - \frac{2\rho r}{\alpha_{\min} \ell} \geq 1 - \frac{1}{\mathcal{T}}, \quad (61)$$

by which we can derive that

$$\frac{\|\mathbf{y}_{t,\parallel}\|}{\|\mathbf{y}_{t,\perp}\|} \geq \frac{\|\mathbf{y}_{0,\parallel}\|}{\|\mathbf{y}_{0,\perp}\|} (1 - 1/\mathcal{T})^t \quad (62)$$

$$\geq \frac{\|\mathbf{y}_{0,\parallel}\|}{\|\mathbf{y}_{0,\perp}\|} \exp\left(-\frac{t}{\mathcal{T}-1}\right) \geq \frac{\|\mathbf{y}_{0,\parallel}\|}{2\|\mathbf{y}_{0,\perp}\|}, \quad (63)$$

indicating

$$\alpha_t = \frac{\|\mathbf{y}_{t,\parallel}\|}{\sqrt{\|\mathbf{y}_{t,\parallel}\|^2 + \|\mathbf{y}_{t,\perp}\|^2}} \geq \frac{\|\mathbf{y}_{0,\parallel}\|}{4\|\mathbf{y}_{0,\perp}\|} \geq \alpha_{\min}. \quad (64)$$

Hence, as long as  $\alpha_k \geq \alpha_{\min}$  for any  $1 \leq k \leq t-1$ , we can also have  $\alpha_t \geq \alpha_{\min}$  if  $t \leq \mathcal{T}$ . Since we have  $\alpha_0 \geq \alpha_{\min}$ , we can thus claim that  $\alpha_t \geq \alpha_{\min}$  for any  $t \leq \mathcal{T}$  using recurrence.  $\square$

## B.2 Proof of Proposition 5

To make it easier to analyze the properties and running time of Algorithm 2, we introduce a new Algorithm 4, which has a more straightforward structure and has the same effect as Algorithm 2 near any saddle point  $\tilde{\mathbf{x}}$ .

---

**Algorithm 4:** Accelerated Negative Curvature Finding without Renormalization( $\tilde{\mathbf{x}}, r', \mathcal{T}'$ ).

---

- 1  $\mathbf{x}_0 \leftarrow \text{Uniform}(\mathbb{B}_0(r'))$  where  $\mathbb{B}_0(r')$  is the  $\ell_2$ -norm ball centered at  $\tilde{\mathbf{x}}$  with radius  $r'$ ;
  - 2  $\mathbf{z}_0 \leftarrow \mathbf{x}_0$ ;
  - 3 **for**  $t = 1, \dots, \mathcal{T}'$  **do**
  - 4      $\mathbf{x}_{t+1} \leftarrow \mathbf{z}_t - \eta \left( \frac{\|\mathbf{z}_t - \tilde{\mathbf{x}}\|}{r'} \nabla f\left(r' \cdot \frac{\mathbf{z}_t - \tilde{\mathbf{x}}}{\|\mathbf{z}_t - \tilde{\mathbf{x}}\|} + \tilde{\mathbf{x}}\right) - \nabla f(\tilde{\mathbf{x}}) \right)$ ;
  - 5      $\mathbf{v}_{t+1} \leftarrow \mathbf{x}_{t+1} - \mathbf{x}_t$ ;
  - 6      $\mathbf{z}_{t+1} \leftarrow \mathbf{x}_{t+1} + (1 - \theta)\mathbf{v}_{t+1}$ ;
  - 7 **Output**  $\frac{\mathbf{x}_{\mathcal{T}'} - \tilde{\mathbf{x}}}{\|\mathbf{x}_{\mathcal{T}'} - \tilde{\mathbf{x}}\|}$ .
- 

Quantitatively, this is demonstrated in the following lemma:

**Lemma 18.** *Under the setting of Proposition 5, suppose the perturbation in Line 5 of Algorithm 2 is added at  $t = 0$ . Then with the same value of  $r'$ ,  $\mathcal{T}'$ ,  $\tilde{\mathbf{x}}$  and  $\mathbf{x}_0$ , the output of Algorithm 4 is the same as the unit vector  $\hat{\mathbf{e}}$  in Algorithm 2 obtained  $\mathcal{T}'$  steps later. In other words, if we separately denote the iteration sequence of  $\{\mathbf{x}_t\}$  in Algorithm 2 and Algorithm 4 as*

$$\{\mathbf{x}_{1,0}, \mathbf{x}_{1,1}, \dots, \mathbf{x}_{1,\mathcal{T}'}\}, \quad \{\mathbf{x}_{2,0}, \mathbf{x}_{2,1}, \dots, \mathbf{x}_{2,\mathcal{T}'}\}, \quad (65)$$

we have

$$\frac{\mathbf{x}_{1,\mathcal{T}'} - \tilde{\mathbf{x}}}{\|\mathbf{x}_{1,\mathcal{T}'} - \tilde{\mathbf{x}}\|} = \frac{\mathbf{x}_{2,\mathcal{T}'} - \tilde{\mathbf{x}}}{\|\mathbf{x}_{2,\mathcal{T}'} - \tilde{\mathbf{x}}\|}. \quad (66)$$

*Proof.* Without loss of generality, we assume  $\tilde{\mathbf{x}} = \mathbf{0}$  and  $\nabla f(\tilde{\mathbf{x}}) = \mathbf{0}$ . Use recurrence to prove the desired relationship. Suppose the following identities holds for all  $k \leq t$  with  $t$  being some natural number:

$$\frac{\mathbf{x}_{2,k}}{\|\mathbf{x}_{2,k}\|} = \frac{\mathbf{x}_{1,k}}{r}, \quad \frac{\mathbf{z}_{2,k}}{\|\mathbf{x}_{2,k}\|} = \frac{\mathbf{z}_{1,k}}{r'}. \quad (67)$$

Then,

$$\mathbf{x}_{2,t+1} = \mathbf{z}_{2,t} - \eta \cdot \frac{\|\mathbf{z}_{2,t}\|}{r'} \nabla f(\mathbf{z}_{2,t} \cdot r' / \|\mathbf{z}_{2,t}\|) = \frac{\|\mathbf{z}_{2,t}\|}{r'} (\mathbf{z}_{1,t} - \eta \nabla f(\mathbf{z}_{1,t})). \quad (68)$$

Adopting the notation in Algorithm 2, we use  $\mathbf{x}'_{1,t+1}$  and  $\mathbf{z}'_{1,t+1}$  to separately denote the value of  $\mathbf{x}_{1,t+1}$  and  $\mathbf{z}_{1,t+1}$  before renormalization:

$$\mathbf{x}'_{1,t+1} = \mathbf{z}_{1,t} - \eta \nabla f(\mathbf{z}_{1,t}), \quad \mathbf{z}'_{1,t+1} = \mathbf{x}'_{1,t+1} + (1 - \theta)(\mathbf{x}'_{1,t+1} - \mathbf{x}_{1,t}). \quad (69)$$

Then,

$$\mathbf{x}_{2,t+1} = \frac{\|\mathbf{z}_{2,t}\|}{r'} (\mathbf{z}_{1,t} - \eta \nabla f(\mathbf{z}_{1,t})) = \frac{\|\mathbf{z}_{2,t}\|}{r'} \cdot \mathbf{x}'_{1,t+1}, \quad (70)$$

which further leads to

$$\mathbf{z}_{2,t+1} = \mathbf{x}_{2,t+1} + (1 - \theta)(\mathbf{x}_{2,t+1} - \mathbf{x}_{2,t}) = \frac{\|\mathbf{z}_{2,t}\|}{r'} \cdot \mathbf{z}'_{1,t+1}. \quad (71)$$

Note that  $\mathbf{z}_{1,t+1} = \frac{r'}{\|\mathbf{z}'_{1,t+1}\|} \cdot \mathbf{z}'_{1,t+1}$ , we thus have

$$\frac{\mathbf{z}_{2,t+1}}{\|\mathbf{z}_{2,t+1}\|} = \frac{\mathbf{z}_{1,t+1}}{r'}. \quad (72)$$

Hence,

$$\mathbf{x}_{2,t+1} = \frac{\|\mathbf{z}_{2,t}\|}{r'} \cdot \mathbf{x}'_{1,t+1} = \frac{\|\mathbf{z}_{2,t}\|}{r'} \cdot \frac{\|\mathbf{z}_{1,t+1}\|}{\|\mathbf{z}_{1,t}\|} \cdot \mathbf{x}_{1,t+1} = \frac{\|\mathbf{z}_{2,t+1}\|}{r'} \cdot \mathbf{x}_{1,t+1}. \quad (73)$$

Since (67) holds for  $k = 0$ , we can now claim that it also holds for  $k = \mathcal{T}'$ .  $\square$

**Lemma 18** shows that, **Algorithm 4** also works in principle for finding the negative curvature near any saddle point  $\tilde{\mathbf{x}}$ . But considering that **Algorithm 4** may result in an exponentially large  $\|\mathbf{x}_t\|$  during execution, and it is hard to be merged with the AGD algorithm for large gradient scenarios. Hence, only **Algorithm 2** is applicable in practical situations.

Use  $\mathcal{H}(\tilde{\mathbf{x}})$  to denote the Hessian matrix of  $f$  at  $\tilde{\mathbf{x}}$ . Observe that  $\mathcal{H}(\tilde{\mathbf{x}})$  admits the following eigen-decomposition:

$$\mathcal{H}(\tilde{\mathbf{x}}) = \sum_{i=1}^n \lambda_i \mathbf{u}_i \mathbf{u}_i^T, \quad (74)$$

where the set  $\{\mathbf{u}_i\}_{i=1}^n$  forms an orthonormal basis of  $\mathbb{R}^n$ . Without loss of generality, we assume the eigenvalues  $\lambda_1, \lambda_2, \dots, \lambda_n$  corresponding to  $\mathbf{u}_1, \mathbf{u}_2, \dots, \mathbf{u}_n$  satisfy

$$\lambda_1 \leq \lambda_2 \leq \dots \leq \lambda_n, \quad (75)$$

in which  $\lambda_1 \leq -\sqrt{\rho\epsilon}$ . If  $\lambda_n \leq -\sqrt{\rho\epsilon}/2$ , **Proposition 5** holds directly, since no matter the value of  $\hat{\epsilon}$ , we can have  $f(\mathbf{x}_{\mathcal{T}'}) - f(\tilde{\mathbf{x}}) \leq -\sqrt{\epsilon^3/\rho}/384$ . Hence, we only need to prove the case where  $\lambda_n > -\sqrt{\rho\epsilon}$ , in which there exists some  $p$  with

$$\lambda_p \leq -\sqrt{\rho\epsilon} < \lambda_{p+1}. \quad (76)$$

We use  $\mathfrak{S}_{\parallel}$  to denote the subspace of  $\mathbb{R}^n$  spanned by  $\{\mathbf{u}_1, \mathbf{u}_2, \dots, \mathbf{u}_p\}$ , and use  $\mathfrak{S}_{\perp}$  to denote the subspace spanned by  $\{\mathbf{u}_{p+1}, \mathbf{u}_{p+2}, \dots, \mathbf{u}_n\}$ . Then we can have the following lemma:

**Lemma 19.** Under the setting of **Proposition 5**, we use  $\alpha'_t$  to denote

$$\alpha'_t = \frac{\|\mathbf{x}_{t,\parallel}\|}{\|\mathbf{x}_t\|}, \quad (77)$$

in which  $\mathbf{x}_{t,\parallel}$  is the component of  $\mathbf{x}_t$  in the subspace  $\mathfrak{S}_{\parallel}$ . Then, during all the  $\mathcal{T}'$  iterations of **Algorithm 4**, we have  $\alpha'_t \geq \alpha'_{\min}$  for

$$\alpha'_{\min} = \frac{\delta_0}{8} \sqrt{\frac{\pi}{n}}, \quad (78)$$

given that  $\alpha'_0 \geq \sqrt{\frac{\pi}{n}} \delta_0$ .

*Proof.* Without loss of generality, assume  $\tilde{\mathbf{x}} = \mathbf{0}$  and  $\nabla f(\tilde{\mathbf{x}}) = \mathbf{0}$ . In this proof, we consider the worst case, where the initial value  $\alpha'_0 = \sqrt{\frac{\pi}{n}} \delta_0$  and the component  $x_{0,1}$  along  $\mathbf{u}_1$  equals 0. Also, the eigenvalues satisfy

$$\lambda_2 = \lambda_3 = \dots = \lambda_p = -\sqrt{\rho\epsilon}, \quad \lambda_{p+1} = \lambda_{p+2} = \dots = \lambda_{n-1} = -\sqrt{\rho\epsilon} + \nu, \quad (79)$$

for an arbitrarily small positive constant  $\nu$ , which can make components of  $\mathbf{x}_t$  in  $\mathfrak{S}_{\perp}$  as large as possible to make  $\alpha'_t$  smaller. Out of the same reason, we assume that each time we make a gradient call at point  $\mathbf{z}_t$ , the derivation term  $\Delta$  from pure quadratic approximation

$$\Delta = \frac{\|\mathbf{z}_t\|}{r'} \cdot \left( \nabla f(\mathbf{z}_t \cdot r' / \|\mathbf{z}_t\|) - \mathcal{H}(\mathbf{0}) \cdot \frac{r'}{\|\mathbf{z}_t\|} \cdot \mathbf{z}_t \right), \quad (80)$$

lies in the direction that can make  $\alpha'_t$  as small as possible. Then, the component  $\Delta_{\parallel}$  in  $\mathfrak{S}_{\parallel}$  should be in the opposite direction to  $\mathbf{z}_{\parallel}$ , and the component  $\Delta_{\perp}$  in  $\mathfrak{S}_{\perp}$  should be in the direction of  $\mathbf{z}_{\perp}$ . Hence in this case, we have both  $\|\mathbf{x}_{t,\perp}\|/\|\mathbf{x}_t\|$  and  $\|\mathbf{z}_{t,\perp}\|/\|\mathbf{z}_t\|$  being non-decreasing, since  $\nu$  can be arbitrarily small. Also, it admits the following recurrence formula:

$$\|\mathbf{x}_{t+2,\perp}\| \leq (1 + \eta(\sqrt{\rho\epsilon} - \nu))(\|\mathbf{x}_{t+1,\perp}\| + (1 - \theta)(\|\mathbf{x}_{t+1,\perp}\| - \|\mathbf{x}_{t,\perp}\|)) + \eta\|\Delta_{\perp}\| \quad (81)$$

$$\leq (1 + \eta\sqrt{\rho\epsilon})(\|\mathbf{x}_{t+1,\perp}\| + (1 - \theta)(\|\mathbf{x}_{t+1,\perp}\| - \|\mathbf{x}_{t,\perp}\|)) + \eta\|\Delta_{\perp}\|, \quad (82)$$

where the second inequality is due to the fact that  $\nu$  can be an arbitrarily small positive number. Note that since  $\|\mathbf{x}_{t,\perp}\|/\|\mathbf{x}_t\|$  is non-decreasing in this worst-case scenario, we have

$$\frac{\|\Delta_\perp\|}{\|\mathbf{x}_{t+1,\perp}\|} \leq \frac{\|\Delta\|}{\|\mathbf{x}_{t+1}\|} \cdot \frac{\|\mathbf{x}_0\|}{\|\mathbf{x}_{0,\perp}\|} \leq \frac{2\|\Delta\|}{\|\mathbf{x}_{t+1}\|} \leq 2\rho r', \quad (83)$$

which leads to

$$\|\mathbf{x}_{t+2,\perp}\| \leq (1 + \eta\sqrt{\rho\epsilon} + 2\eta\rho r')((2 - \theta)\|\mathbf{x}_{t+1,\perp}\| - (1 - \theta)\|\mathbf{x}_{t,\perp}\|). \quad (84)$$

On the other hand, suppose for some value  $t$ , we have  $\alpha'_k \geq \alpha'_{\min}$  with any  $1 \leq k \leq t + 1$ . Then,

$$\|\mathbf{x}_{t+2,\parallel}\| \geq (1 + \eta(\sqrt{\rho\epsilon} - \nu))(\|\mathbf{x}_{t+1,\parallel}\| + (1 - \theta)(\|\mathbf{x}_{t+1,\parallel}\| - \|\mathbf{x}_{t,\parallel}\|)) + \eta\|\Delta_\parallel\| \quad (85)$$

$$\geq (1 + \eta\sqrt{\rho\epsilon})(\|\mathbf{x}_{t+1,\parallel}\| + (1 - \theta)(\|\mathbf{x}_{t+1,\parallel}\| - \|\mathbf{x}_{t,\parallel}\|)) - \eta\|\Delta\|. \quad (86)$$

Note that since  $\|\mathbf{x}_{t+1,\parallel}\|/\|\mathbf{x}_t\| \geq \alpha'_{\min}$ , we have

$$\frac{\|\Delta\|}{\|\mathbf{x}_{t+1,\parallel}\|} \geq \frac{\|\Delta\|}{\alpha'_{\min}\|\mathbf{x}_{t+1}\|} = \rho r' / \alpha'_{\min}, \quad (87)$$

which leads to

$$\|\mathbf{x}_{t+2,\parallel}\| \geq (1 + \eta\sqrt{\rho\epsilon} - \eta\rho r' / \alpha'_{\min})((2 - \theta)\|\mathbf{x}_{t+1,\parallel}\| - (1 - \theta)\|\mathbf{x}_{t,\parallel}\|). \quad (88)$$

Consider the sequences with recurrence that can be written as

$$\xi_{t+2} = (1 + \kappa)((2 - \theta)\xi_{t+1} - (1 - \theta)\xi_t) \quad (89)$$

for some  $\kappa > 0$ . Its characteristic equation can be written as

$$x^2 - (1 + \kappa)(2 - \theta)x + (1 + \kappa)(1 - \theta) = 0, \quad (90)$$

whose roots satisfy

$$x = \frac{1 + \kappa}{2} \left( (2 - \theta) \pm \sqrt{(2 - \theta)^2 - \frac{4(1 - \theta)}{1 + \kappa}} \right), \quad (91)$$

indicating

$$\xi_t = \left( \frac{1 + \kappa}{2} \right)^t (C_1(2 - \theta + \mu)^t + C_2(2 - \theta - \mu)^t), \quad (92)$$

where  $\mu := \sqrt{(2 - \theta)^2 - \frac{4(1 - \theta)}{1 + \kappa}}$ , for constants  $C_1$  and  $C_2$  being

$$\begin{cases} C_1 = -\frac{2 - \theta - \mu}{2\mu}\xi_0 + \frac{1}{(1 + \kappa)\mu}\xi_1, \\ C_2 = \frac{2 - \theta + \mu}{2\mu}\xi_0 - \frac{1}{(1 + \kappa)\mu}\xi_1. \end{cases} \quad (93)$$

Then by the inequalities (84) and (88), as long as  $\alpha'_k \geq \alpha'_{\min}$  for any  $1 \leq k \leq t - 1$ , the values  $\|\mathbf{x}_{t,\perp}\|$  and  $\|\mathbf{x}_{t,\parallel}\|$  satisfy

$$\|\mathbf{x}_{t,\perp}\| \leq \left( -\frac{2 - \theta - \mu_\perp}{2\mu_\perp}\xi_{0,\perp} + \frac{1}{(1 + \kappa_\perp)\mu_\perp}\xi_{1,\perp} \right) \cdot \left( \frac{1 + \kappa_\perp}{2} \right)^t \cdot (2 - \theta + \mu_\perp)^t \quad (94)$$

$$+ \left( \frac{2 - \theta + \mu_\perp}{2\mu_\perp}\xi_{0,\perp} - \frac{1}{(1 + \kappa_\perp)\mu_\perp}\xi_{1,\perp} \right) \cdot \left( \frac{1 + \kappa_\perp}{2} \right)^t \cdot (2 - \theta - \mu_\perp)^t, \quad (95)$$

and

$$\|\mathbf{x}_{t,\parallel}\| \geq \left( -\frac{2 - \theta - \mu_\parallel}{2\mu_\parallel}\xi_{0,\parallel} + \frac{1}{(1 + \kappa_\parallel)\mu_\parallel}\xi_{1,\parallel} \right) \cdot \left( \frac{1 + \kappa_\parallel}{2} \right)^t \cdot (2 - \theta + \mu_\parallel)^t \quad (96)$$

$$+ \left( \frac{2 - \theta + \mu_\parallel}{2\mu_\parallel}\xi_{0,\parallel} - \frac{1}{(1 + \kappa_\parallel)\mu_\parallel}\xi_{1,\parallel} \right) \cdot \left( \frac{1 + \kappa_\parallel}{2} \right)^t \cdot (2 - \theta - \mu_\parallel)^t, \quad (97)$$

where

$$\kappa_\perp = \eta\sqrt{\rho\epsilon} + 2\eta\rho r', \quad \xi_{0,\perp} = \|\mathbf{x}_{0,\perp}\|, \quad \xi_{1,\perp} = (1 + \kappa_\perp)\xi_{0,\perp}, \quad (98)$$

$$\kappa_\parallel = \eta\sqrt{\rho\epsilon} - \eta\rho r' / \alpha'_{\min}, \quad \xi_{0,\parallel} = \|\mathbf{x}_{0,\parallel}\|, \quad \xi_{1,\parallel} = (1 + \kappa_\parallel)\xi_{0,\parallel}. \quad (99)$$

Further we can derive that

$$\|\mathbf{x}_{t,\perp}\| \leq \|\mathbf{x}_{0,\perp}\| \cdot \left( \frac{1 + \kappa_\perp}{2} \right)^t \cdot (2 - \theta + \mu_\perp)^t, \quad (100)$$

and

$$\|\mathbf{x}_{t,\parallel}\| \geq \frac{\|\mathbf{x}_{0,\parallel}\|}{2} \cdot \left(\frac{1+\kappa_{\parallel}}{2}\right)^t \cdot (2-\theta+\mu_{\parallel})^t. \quad (101)$$

Then we can observe that

$$\frac{\|\mathbf{x}_{t,\parallel}\|}{\|\mathbf{x}_{t,\perp}\|} \geq \frac{\|\mathbf{x}_{0,\parallel}\|}{2\|\mathbf{x}_{0,\perp}\|} \cdot \left(\frac{1+\kappa_{\parallel}}{1+\kappa_{\perp}}\right)^t \cdot \left(\frac{2-\theta+\mu_{\parallel}}{2-\theta+\mu_{\perp}}\right)^t, \quad (102)$$

where

$$\frac{1+\kappa_{\parallel}}{1+\kappa_{\perp}} \geq (1+\kappa_{\parallel})(1-\kappa_{\perp}) \quad (103)$$

$$\geq 1 - (2 + 1/\alpha'_{\min})\eta\rho r' - \kappa_{\parallel}\kappa_{\perp} \quad (104)$$

$$\geq 1 - 2\eta\rho r'/\alpha'_{\min}, \quad (105)$$

and

$$\frac{2-\theta+\mu_{\parallel}}{2-\theta+\mu_{\perp}} = \frac{1+\mu_{\parallel}/(2-\theta)}{1+\mu_{\perp}/(2-\theta)} \quad (106)$$

$$= \frac{1 + \sqrt{1 - \frac{4(1-\theta)}{(1+\kappa_{\parallel})(2-\theta)^2}}}{1 + \sqrt{1 - \frac{4(1-\theta)}{(1+\kappa_{\perp})(2-\theta)^2}}} \quad (107)$$

$$\geq \left(1 + \frac{1}{2-\theta} \sqrt{\frac{\theta^2 + \kappa_{\parallel}(2-\theta)^2}{1+\kappa_{\parallel}}}\right) \left(1 - \frac{1}{2-\theta} \sqrt{\frac{\theta^2 + \kappa_{\perp}(2-\theta)^2}{1+\kappa_{\perp}}}\right) \quad (108)$$

$$\geq 1 - \frac{2(\kappa_{\perp} - \kappa_{\parallel})}{\theta} \geq 1 - \frac{3\eta\rho r'}{\alpha'_{\min}\theta}, \quad (109)$$

by which we can derive that

$$\frac{\|\mathbf{x}_{t,\parallel}\|}{\|\mathbf{x}_{t,\perp}\|} \geq \frac{\|\mathbf{x}_{0,\parallel}\|}{2\|\mathbf{x}_{0,\perp}\|} \cdot \left(1 - \frac{4\rho r'}{\alpha'_{\min}\theta}\right)^t \quad (110)$$

$$\geq \frac{\|\mathbf{x}_{0,\parallel}\|}{2\|\mathbf{x}_{0,\perp}\|} (1 - 1/\mathcal{T}')^t \quad (111)$$

$$\geq \frac{\|\mathbf{x}_{0,\parallel}\|}{2\|\mathbf{x}_{0,\perp}\|} \exp\left(-\frac{t}{\mathcal{T}'-1}\right) \geq \frac{\|\mathbf{x}_{0,\parallel}\|}{4\|\mathbf{x}_{0,\perp}\|}, \quad (112)$$

indicating

$$\alpha'_t = \frac{\|\mathbf{x}_{t,\parallel}\|}{\sqrt{\|\mathbf{x}_{t,\parallel}\|^2 + \|\mathbf{x}_{t,\perp}\|^2}} \geq \frac{\|\mathbf{x}_{0,\parallel}\|}{8\|\mathbf{x}_{0,\perp}\|} \geq \alpha'_{\min}. \quad (113)$$

Hence, as long as  $\alpha'_k \geq \alpha'_{\min}$  for any  $1 \leq k \leq t-1$ , we can also have  $\alpha'_t \geq \alpha'_{\min}$  if  $t \leq \mathcal{T}'$ . Since we have  $\alpha'_0 \geq \alpha'_{\min}$  and  $\alpha'_1 \geq \alpha'_{\min}$ , we can claim that  $\alpha'_t \geq \alpha'_{\min}$  for any  $t \leq \mathcal{T}'$  using recurrence.  $\square$

Equipped with [Lemma 19](#), we are now ready to prove [Proposition 5](#).

*Proof.* By [Lemma 18](#), the unit vector  $\hat{\mathbf{e}}$  in [Line 7](#) of [Algorithm 2](#) obtained after  $\mathcal{T}'$  iterations equals to the output of [Algorithm 4](#) starting from  $\tilde{\mathbf{x}}$ . Hence in this proof we consider the output of [Algorithm 4](#) instead of the original [Algorithm 2](#).

If  $\lambda_n \leq -\sqrt{\rho\epsilon}/2$ , [Proposition 5](#) holds directly. Hence, we only need to prove the case where  $\lambda_n > -\sqrt{\rho\epsilon}/2$ , in which there exists some  $p'$  with

$$\lambda'_p \leq -\sqrt{\rho\epsilon}/2 < \lambda_{p+1}. \quad (114)$$

We use  $\mathfrak{S}'_{\parallel}, \mathfrak{S}'_{\perp}$  to denote the subspace of  $\mathbb{R}^n$  spanned by  $\{\mathbf{u}_1, \mathbf{u}_2, \dots, \mathbf{u}_{p'}\}, \{\mathbf{u}_{p'+1}, \mathbf{u}_{p+2}, \dots, \mathbf{u}_n\}$ . Furthermore, we define  $\mathbf{x}_{t,\parallel'} := \sum_{i=1}^{p'} \langle \mathbf{u}_i, \mathbf{x}_t \rangle \mathbf{u}_i$ ,  $\mathbf{x}_{t,\perp'} := \sum_{i=p'+1}^n \langle \mathbf{u}_i, \mathbf{x}_t \rangle \mathbf{u}_i$ ,  $\mathbf{v}_{t,\parallel'} := \sum_{i=1}^{p'} \langle \mathbf{u}_i, \mathbf{v}_t \rangle \mathbf{u}_i$ ,  $\mathbf{v}_{t,\perp'} := \sum_{i=p'+1}^n \langle \mathbf{u}_i, \mathbf{v}_t \rangle \mathbf{u}_i$  respectively to denote the component of  $\mathbf{x}'_t$  and  $\mathbf{v}'_t$  in [Algorithm 4](#) in the subspaces  $\mathfrak{S}'_{\parallel}, \mathfrak{S}'_{\perp}$ , and let  $\alpha'_t := \|\mathbf{x}_{t,\parallel'}\|/\|\mathbf{x}_t\|$ . Consider the case where  $\alpha'_0 \geq \sqrt{\frac{\pi}{n}}\delta_0$ , which can be achieved with probability

$$\Pr \left\{ \alpha'_0 \geq \sqrt{\frac{\pi}{n}}\delta_0 \right\} \geq 1 - \sqrt{\frac{\pi}{n}}\delta_0 \cdot \frac{\text{Vol}(\mathbb{B}_0^{n-1}(1))}{\text{Vol}(\mathbb{B}_0^n(1))} \geq 1 - \sqrt{\frac{\pi}{n}}\delta_0 \cdot \sqrt{\frac{n}{\pi}} = 1 - \delta_0, \quad (115)$$

we prove that there exists some  $t_0$  with  $1 \leq t_0 \leq \mathcal{T}'$  such that

$$\frac{\|\mathbf{x}_{t_0, \perp'}\|}{\|\mathbf{x}_{t_0}\|} \leq \frac{\sqrt{\rho\epsilon}}{8\ell}. \quad (116)$$

Assume the contrary, for any  $t$  with  $1 \leq t \leq \mathcal{T}'$ , we all have  $\frac{\|\mathbf{x}_{t, \perp'}\|}{\|\mathbf{x}_t\|} > \frac{\sqrt{\rho\epsilon}}{8\ell}$  and  $\frac{\|\mathbf{z}_{t, \perp'}\|}{\|\mathbf{z}_t\|} > \frac{\sqrt{\rho\epsilon}}{8\ell}$ . Focus on the case where  $\|\mathbf{x}_{t, \perp'}\|$ , the component of  $\mathbf{x}_t$  in subspace  $\mathfrak{S}'_{\perp}$ , achieves the largest value possible. Then in this case, we have the following recurrence formula:

$$\|\mathbf{x}_{t+2, \perp'}\| \leq (1 + \eta\sqrt{\rho\epsilon}/2)(\|\mathbf{x}_{t+1, \perp'}\| + (1 - \theta)(\|\mathbf{x}_{t+1, \perp'}\| - \|\mathbf{x}_{t, \perp'}\|)) + \eta\|\Delta_{\perp'}\|. \quad (117)$$

Since  $\frac{\|\mathbf{z}_{k, \perp'}\|}{\|\mathbf{z}_k\|} \geq \frac{\sqrt{\rho\epsilon}}{8\ell}$  for any  $1 \leq k \leq t+1$ , we can derive that

$$\frac{\|\Delta_{\perp}\|}{\|\mathbf{x}_{t+1, \perp}\| + (1 - \theta)(\|\mathbf{x}_{t+1, \perp}\| - \|\mathbf{x}_{t, \perp}\|)} \leq \frac{\|\Delta_{\perp}\|}{\|\mathbf{z}_{t, \perp'}\|} \leq \frac{2\rho r'}{\sqrt{\rho\epsilon}}, \quad (118)$$

which leads to

$$\|\mathbf{x}_{t+2, \perp'}\| \leq (1 + \eta\sqrt{\rho\epsilon}/2)(\|\mathbf{x}_{t+1, \perp'}\| + (1 - \theta)(\|\mathbf{x}_{t+1, \perp'}\| - \|\mathbf{x}_{t, \perp'}\|)) + \eta\|\Delta_{\perp'}\| \quad (119)$$

$$\leq (1 + \eta\sqrt{\rho\epsilon}/2 + 2\rho r'/\sqrt{\rho\epsilon})((2 - \theta)\|\mathbf{x}_{t+1, \perp'}\| - (1 - \theta)\|\mathbf{x}_{t, \perp'}\|). \quad (120)$$

Using similar characteristic function techniques shown in the proof of [Lemma 19](#), it can be further derived that

$$\|\mathbf{x}_{t, \perp'}\| \leq \|\mathbf{x}_{0, \perp'}\| \cdot \left(\frac{1 + \kappa_{\perp'}}{2}\right)^t \cdot (2 - \theta + \mu_{\perp'})^t, \quad (121)$$

for  $\kappa_{\perp'} = \eta\sqrt{\rho\epsilon}/2 + 2\rho r'/\sqrt{\rho\epsilon}$  and  $\mu_{\perp'} = \sqrt{(2 - \theta)^2 - \frac{4(1 - \theta)}{1 + \kappa_{\perp'}}}$ , given  $\frac{\|\mathbf{x}_{k, \perp'}\|}{\|\mathbf{x}_k\|} \geq \frac{\sqrt{\rho\epsilon}}{8\ell}$  and  $\frac{\|\mathbf{z}_{k, \perp'}\|}{\|\mathbf{z}_k\|} \geq \frac{\sqrt{\rho\epsilon}}{8\ell}$  for any  $1 \leq k \leq t - 1$ . Due to [Lemma 19](#),

$$\alpha'_t \geq \alpha'_{\min} = \frac{\delta_0}{8} \sqrt{\frac{\pi}{n}}, \quad \forall 1 \leq t \leq \mathcal{T}'. \quad (122)$$

and it is demonstrated in the proof of [Lemma 19](#) that,

$$\|\mathbf{x}_{t, \parallel}\| \geq \frac{\|\mathbf{x}_{0, \parallel}\|}{2} \cdot \left(\frac{1 + \kappa_{\parallel}}{2}\right)^t \cdot (2 - \theta + \mu_{\parallel})^t, \quad \forall 1 \leq t \leq \mathcal{T}', \quad (123)$$

for  $\kappa_{\parallel} = \eta\sqrt{\rho\epsilon} - \eta\rho r'/\alpha'_{\min}$  and  $\mu_{\parallel} = \sqrt{(2 - \theta)^2 - \frac{4(1 - \theta)}{1 + \kappa_{\parallel}}}$ . Observe that

$$\frac{\|\mathbf{x}_{\mathcal{T}', \perp'}\|}{\|\mathbf{x}_{\mathcal{T}', \parallel}\|} \leq \frac{2\|\mathbf{x}_{0, \perp'}\|}{\|\mathbf{x}_{0, \parallel}\|} \cdot \left(\frac{1 + \kappa_{\perp'}}{1 + \kappa_{\parallel}}\right)^{\mathcal{T}'} \cdot \left(\frac{2 - \theta + \mu_{\perp'}}{2 - \theta + \mu_{\parallel}}\right)^{\mathcal{T}'} \quad (124)$$

$$\leq \frac{2}{\delta_0} \sqrt{\frac{n}{\pi}} \left(\frac{1 + \kappa_{\perp'}}{1 + \kappa_{\parallel}}\right)^{\mathcal{T}'} \cdot \left(\frac{2 - \theta + \mu_{\perp'}}{2 - \theta + \mu_{\parallel}}\right)^{\mathcal{T}'}, \quad (125)$$

where

$$\frac{1 + \kappa_{\perp'}}{1 + \kappa_{\parallel}} \leq \frac{1}{1 + (\kappa_{\parallel} - \kappa_{\perp'})} = 1 - \frac{1}{\eta\sqrt{\rho\epsilon}/2 + \rho r'(\eta/\alpha'_{\min'} + 2/\sqrt{\rho\epsilon})} \leq 1 - \frac{\eta\sqrt{\rho\epsilon}}{4}, \quad (126)$$

and

$$\frac{2 - \theta + \mu_{\perp'}}{2 - \theta + \mu_{\parallel}} = \frac{1 + \sqrt{1 - \frac{4(1 - \theta)}{(1 + \kappa_{\perp'})(2 - \theta)^2}}}{1 + \sqrt{1 - \frac{4(1 - \theta)}{(1 + \kappa_{\parallel})(2 - \theta)^2}}} \quad (127)$$

$$\leq \frac{1}{1 + \left(\sqrt{1 - \frac{4(1 - \theta)}{(1 + \kappa_{\perp'})(2 - \theta)^2}} - \sqrt{1 - \frac{4(1 - \theta)}{(1 + \kappa_{\parallel})(2 - \theta)^2}}\right)} \quad (128)$$

$$\leq 1 - \frac{\kappa_{\parallel} - \kappa_{\perp'}}{\theta} \quad (129)$$

$$\leq 1 - \frac{\eta\sqrt{\rho\epsilon}}{4\theta} = 1 - \frac{(\rho\epsilon)^{1/4}}{16\sqrt{\ell}}. \quad (130)$$

Hence,

$$\frac{\|\mathbf{x}_{\mathcal{T}', \perp'}\|}{\|\mathbf{x}_{\mathcal{T}', \parallel}\|} \leq \frac{2}{\delta_0} \sqrt{\frac{n}{\pi}} \left(1 - \frac{(\rho\epsilon)^{1/4}}{16\sqrt{\ell}}\right)^{\mathcal{T}'} \leq \frac{\sqrt{\rho\epsilon}}{8\ell}. \quad (131)$$

Since  $\|\mathbf{x}_{\mathcal{T}',\perp}\| \leq \|\mathbf{x}_{\mathcal{T}'}\|$ , we have  $\frac{\|\mathbf{x}_{\mathcal{T}',\perp}\|}{\|\mathbf{x}_{\mathcal{T}'}\|} \leq \frac{\sqrt{\rho\epsilon}}{8\ell}$ , contradiction. Hence, there here exists some  $t_0$  with  $1 \leq t_0 \leq \mathcal{T}'$  such that  $\frac{\|\mathbf{x}_{t_0,\perp}\|}{\|\mathbf{x}_{t_0}\|} \leq \frac{\sqrt{\rho\epsilon}}{8\ell}$ . Consider the normalized vector  $\hat{\mathbf{e}} = \mathbf{x}_{t_0}/r$ , we use  $\hat{\mathbf{e}}_{\perp'}$  and  $\hat{\mathbf{e}}_{\parallel'}$  to separately denote the component of  $\hat{\mathbf{e}}$  in  $\mathfrak{S}'_{\perp}$  and  $\mathfrak{S}'_{\parallel}$ . Then,  $\|\hat{\mathbf{e}}_{\perp'}\| \leq \sqrt{\rho\epsilon}/(8\ell)$  whereas  $\|\hat{\mathbf{e}}_{\parallel'}\| \geq 1 - \rho\epsilon/(8\ell)^2$ . Then,

$$\hat{\mathbf{e}}^T \mathcal{H}(\mathbf{0}) \hat{\mathbf{e}} = (\hat{\mathbf{e}}_{\perp'} + \hat{\mathbf{e}}_{\parallel'})^T \mathcal{H}(\mathbf{0}) (\hat{\mathbf{e}}_{\perp'} + \hat{\mathbf{e}}_{\parallel'}), \quad (132)$$

since  $\mathcal{H}(\mathbf{0})\hat{\mathbf{e}}_{\perp'} \in \mathfrak{S}'_{\perp}$  and  $\mathcal{H}(\mathbf{0})\hat{\mathbf{e}}_{\parallel'} \in \mathfrak{S}'_{\parallel}$ , it can be further simplified to

$$\hat{\mathbf{e}}^T \mathcal{H}(\mathbf{0}) \hat{\mathbf{e}} = \hat{\mathbf{e}}_{\perp'}^T \mathcal{H}(\mathbf{0}) \hat{\mathbf{e}}_{\perp'} + \hat{\mathbf{e}}_{\parallel'}^T \mathcal{H}(\mathbf{0}) \hat{\mathbf{e}}_{\parallel'}, \quad (133)$$

Due to the  $\ell$ -smoothness of the function, all eigenvalue of the Hessian matrix has its absolute value upper bounded by  $\ell$ . Hence,

$$\hat{\mathbf{e}}_{\perp'}^T \mathcal{H}(\mathbf{0}) \hat{\mathbf{e}}_{\perp'} \leq \ell \|\hat{\mathbf{e}}_{\perp'}\|_2^2 = \frac{\rho\epsilon}{64\ell^2}. \quad (134)$$

Further according to the definition of  $\mathfrak{S}_{\parallel}$ , we have

$$\hat{\mathbf{e}}_{\parallel'}^T \mathcal{H}(\mathbf{0}) \hat{\mathbf{e}}_{\parallel'} \leq -\frac{\sqrt{\rho\epsilon}}{2} \|\hat{\mathbf{e}}_{\parallel'}\|^2. \quad (135)$$

Combining these two inequalities together, we can obtain

$$\hat{\mathbf{e}}^T \mathcal{H}(\mathbf{0}) \hat{\mathbf{e}} = \hat{\mathbf{e}}_{\perp'}^T \mathcal{H}(\mathbf{0}) \hat{\mathbf{e}}_{\perp'} + \hat{\mathbf{e}}_{\parallel'}^T \mathcal{H}(\mathbf{0}) \hat{\mathbf{e}}_{\parallel'} \leq -\frac{\sqrt{\rho\epsilon}}{2} \|\hat{\mathbf{e}}_{\parallel'}\|^2 + \frac{\rho\epsilon}{64\ell^2} \leq -\frac{\sqrt{\rho\epsilon}}{4}. \quad (136)$$

□

## C Proof details of escaping from saddle points by negative curvature finding

### C.1 Algorithms for escaping from saddle points using negative curvature finding

In this subsection, we first present algorithm for escaping from saddle points using [Algorithm 1](#) as [Algorithm 5](#).

---

#### Algorithm 5: Perturbed Gradient Descent with Negative Curvature Finding

---

```

1 Input:  $\mathbf{x}_0 \in \mathbb{R}^n$ ;
2 for  $t = 0, 1, \dots, T$  do
3   if  $\|\nabla f(\mathbf{x}_t)\| \leq \epsilon$  then
4      $\hat{\mathbf{e}} \leftarrow \text{NegativeCurvatureFinding}(\mathbf{x}_t, r, \mathcal{T})$ ;
5      $\mathbf{x}_t \leftarrow \mathbf{x}_t - \frac{f'_{\hat{\mathbf{e}}}(\mathbf{x}_0)}{4|f'_{\hat{\mathbf{e}}}(\mathbf{x}_0)|} \sqrt{\frac{\epsilon}{\rho}} \cdot \hat{\mathbf{e}}$ ;
6    $\mathbf{x}_{t+1} \leftarrow \mathbf{x}_t - \frac{1}{\ell} \nabla f(\mathbf{x}_t)$ ;

```

---

Observe that [Algorithm 5](#) and [Algorithm 2](#) are similar to perturbed gradient descent and perturbed accelerated gradient descent but the uniform perturbation step is replaced by our negative curvature finding algorithms. One may wonder that [Algorithm 5](#) seems to involve nested loops since negative curvature finding algorithm are contained in the primary loop, contradicting our previous claim that [Algorithm 5](#) only contains a single loop. But actually, [Algorithm 5](#) contains only two operations: gradient descents and one perturbation step, the same as operations outside the negative curvature finding algorithms. Hence, [Algorithm 5](#) is essentially single-loop algorithm, and we count their iteration number as the total number of gradient calls.

### C.2 Proof details of escaping saddle points using [Algorithm 1](#)

In this subsection, we prove:

**Theorem 20.** For any  $\epsilon > 0$  and  $0 < \delta \leq 1$ , [Algorithm 5](#) with parameters chosen in [Proposition 3](#) satisfies that at least  $1/4$  of its iterations will be  $\epsilon$ -approximate second-order stationary point, using

$$\tilde{O}\left(\frac{(f(\mathbf{x}_0) - f^*)}{\epsilon^2} \cdot \log n\right)$$

iterations, with probability at least  $1 - \delta$ , where  $f^*$  is the global minimum of  $f$ .



*Proof.* Let the parameters be chosen according to (2), and set the total step number  $T$  to be:

$$T = \max \left\{ \frac{8\ell(f(\mathbf{x}_0) - f^*)}{\epsilon^2}, 768(f(\mathbf{x}_0) - f^*) \cdot \sqrt{\frac{\rho}{\epsilon^3}} \right\}, \quad (137)$$

similar to the perturbed gradient descent algorithm [21, Algorithm 4]. We first assume that for each  $\mathbf{x}_t$  we apply negative curvature finding (Algorithm 1) with  $\delta_0$  contained in the parameters be chosen as

$$\delta_0 = \frac{1}{384(f(\mathbf{x}_0) - f^*)} \sqrt{\frac{\epsilon^3}{\rho}} \delta, \quad (138)$$

we can successfully obtain a unit vector  $\hat{\mathbf{e}}$  with  $\hat{\mathbf{e}}^T \mathcal{H} \hat{\mathbf{e}} \leq -\sqrt{\rho\epsilon}/4$ , as long as  $\lambda_{\min}(\mathcal{H}(\mathbf{x}_t)) \leq -\sqrt{\rho\epsilon}$ . The error probability of this assumption is provided later.

Under this assumption, Algorithm 1 can be called for at most  $384(f(\mathbf{x}_0) - f^*)\sqrt{\frac{\rho}{\epsilon^3}} \leq \frac{T}{2}$  times, for otherwise the function value decrease will be greater than  $f(\mathbf{x}_0) - f^*$ , which is not possible. Then, the error probability that some calls to Algorithm 1 fails is upper bounded by

$$384(f(\mathbf{x}_0) - f^*)\sqrt{\frac{\rho}{\epsilon^3}} \cdot \delta_0 = \delta. \quad (139)$$

For the rest of iterations in which Algorithm 1 is not called, they are either large gradient steps,  $\|\nabla f(\mathbf{x}_t)\| \geq \epsilon$ , or  $\epsilon$ -approximate second-order stationary points. Within them, we know that the number of large gradient steps cannot be more than  $T/4$  because otherwise, by Lemma 10 in Appendix A:

$$f(\mathbf{x}_T) \leq f(\mathbf{x}_0) - T\eta\epsilon^2/8 < f^*,$$

a contradiction. Therefore, we conclude that at least  $T/4$  of the iterations must be  $\epsilon$ -approximate second-order stationary points, with probability at least  $1 - \delta$ .

The number of iterations can be viewed as the sum of two parts, the number of iterations needed for gradient descent, denoted by  $T_1$ , and the number of iterations needed for negative curvature finding, denoted by  $T_2$ . with probability at least  $1 - \delta$ ,

$$T_1 = T = \tilde{O}\left(\frac{(f(\mathbf{x}_0) - f^*)}{\epsilon^2}\right). \quad (140)$$

As for  $T_2$ , with probability at least  $1 - \delta$ , Algorithm 1 is called for at most  $384(f(\mathbf{x}_0) - f^*)\sqrt{\frac{\rho}{\epsilon^3}}$  times, and by Proposition 3 it takes  $\tilde{O}\left(\frac{\log n}{\sqrt{\rho\epsilon}}\right)$  iterations each time. Hence,

$$T_2 = 384(f(\mathbf{x}_0) - f^*)\sqrt{\frac{\rho}{\epsilon^3}} \cdot \tilde{O}\left(\frac{\log n}{\sqrt{\rho\epsilon}}\right) = \tilde{O}\left(\frac{(f(\mathbf{x}_0) - f^*)}{\epsilon^2} \cdot \log n\right). \quad (141)$$

As a result, the total iteration number  $T_1 + T_2$  is

$$\tilde{O}\left(\frac{(f(\mathbf{x}_0) - f^*)}{\epsilon^2} \cdot \log n\right). \quad (142)$$

□

### C.3 Proof details of escaping saddle points using Algorithm 2

We first present here the Negative Curvature Exploitation algorithm proposed in [22, Algorithm 3] appearing in Line 16 of Algorithm 2:

---

**Algorithm 6:** Negative Curvature Exploitation( $\mathbf{x}_t, \mathbf{v}_t, s$ )

---

- 1 **if**  $\|\mathbf{v}_t\| \geq s$  **then**
  - 2      $\mathbf{x}_{t+1} \leftarrow \mathbf{x}_t$ ;
  - 3 **else**
  - 4      $\xi = s \cdot \mathbf{v}_t / \|\mathbf{v}_t\|$ ;
  - 5      $\mathbf{x}_t \leftarrow \operatorname{argmin}_{\mathbf{x} \in \{\mathbf{x}_t + \xi, \mathbf{x}_t - \xi\}} f(\mathbf{x})$ ;
  - 6 **Output** ( $\mathbf{z}_{t+1}, \mathbf{0}$ ).
- 

Now, we give the full version of Theorem 7 as follows:

**Theorem 21.** Suppose that the function  $f$  is  $\ell$ -smooth and  $\rho$ -Hessian Lipschitz. For any  $\epsilon > 0$  and a constant  $0 < \delta \leq 1$ , we choose the parameters appearing in [Algorithm 2](#) as follows:

$$\delta_0 = \frac{\delta}{384\Delta_f} \sqrt{\frac{\epsilon^3}{\rho}}, \quad \mathcal{T}' = \frac{32\sqrt{\ell}}{(\rho\epsilon)^{1/4}} \log\left(\frac{\ell}{\delta_0} \sqrt{\frac{n}{\rho\epsilon}}\right), \quad \zeta = \frac{\ell}{\sqrt{\rho\epsilon}}, \quad (143)$$

$$r' = \frac{\delta_0\epsilon}{32} \sqrt{\frac{\pi}{\rho n}}, \quad \eta = \frac{1}{4\ell}, \quad \theta = \frac{1}{4\sqrt{\zeta}}, \quad (144)$$

$$\mathcal{E} = \sqrt{\frac{\epsilon^3}{\rho}} \cdot c_A^{-7}, \quad \gamma = \frac{\theta^2}{\eta}, \quad s = \frac{\gamma}{4\rho}, \quad (145)$$

where  $\Delta_f := f(\mathbf{x}_0) - f^*$  and  $f^*$  is the global minimum of  $f$ , and the constant  $c_A$  is chosen large enough to satisfy both the condition in [Lemma 15](#) and  $c_A \geq (384)^{1/7}$ . Then, [Algorithm 2](#) satisfies that at least one of the iterations  $\mathbf{z}_t$  will be an  $\epsilon$ -approximate second-order stationary point in

$$\tilde{O}\left(\frac{(f(\mathbf{x}_0) - f^*)}{\epsilon^{1.75}} \cdot \log n\right) \quad (146)$$

iterations, with probability at least  $1 - \delta$ .

*Proof.* Set the total step number  $T$  to be:

$$T = \max\left\{\frac{4\Delta_f(\tilde{\mathcal{T}} + \mathcal{T}')}{\mathcal{E}}, 768\Delta_f\mathcal{T}'\sqrt{\frac{\rho}{\epsilon^3}}\right\} = \tilde{O}\left(\frac{(f(\mathbf{x}_0) - f^*)}{\epsilon^{1.75}} \cdot \log n\right), \quad (147)$$

where  $\tilde{\mathcal{T}} = \sqrt{\zeta} \cdot c_A$  as defined in [Lemma 15](#), similar to the perturbed accelerated gradient descent algorithm [22, Algorithm 2]. We first assert that for each iteration  $\mathbf{x}_t$  that a uniform perturbation is added, after  $\mathcal{T}'$  iterations we can successfully obtain a unit vector  $\hat{\mathbf{e}}$  with  $\hat{\mathbf{e}}^T \mathcal{H} \hat{\mathbf{e}} \leq -\sqrt{\rho\epsilon}/4$ , as long as  $\lambda_{\min}(\mathcal{H}(\mathbf{x}_t)) \leq -\sqrt{\rho\epsilon}$ . The error probability of this assumption is provided later.

Under this assumption, the uniform perturbation can be called for at most  $384(f(\mathbf{x}_0) - f^*)\sqrt{\frac{\rho}{\epsilon^3}}$  times, for otherwise the function value decrease will be greater than  $f(\mathbf{x}_0) - f^*$ , which is not possible. Then, the probability that at least one negative curvature finding subroutine after uniform perturbation fails is upper bounded by

$$384(f(\mathbf{x}_0) - f^*)\sqrt{\frac{\rho}{\epsilon^3}} \cdot \delta_0 = \delta. \quad (148)$$

For the rest of steps which is not within  $\mathcal{T}'$  steps after uniform perturbation, they are either large gradient steps,  $\|\nabla f(\mathbf{x}_t)\| \geq \epsilon$ , or  $\epsilon$ -approximate second-order stationary points. Next, we demonstrate that at least one of these steps is an  $\epsilon$ -approximate stationary point.

Assume the contrary. We use  $N_{\tilde{\mathcal{T}}}$  to denote the number of disjoint time periods with length larger than  $\tilde{\mathcal{T}}$  containing only large gradient steps and do not contain any step within  $\mathcal{T}'$  steps after uniform perturbation. Then, it satisfies

$$N_{\tilde{\mathcal{T}}} \geq \frac{T}{2(\tilde{\mathcal{T}} + \mathcal{T}')} - 384\Delta_f\sqrt{\frac{\rho}{\epsilon^3}} \geq (2c_A^7 - 384)\Delta_f\sqrt{\frac{\rho}{\epsilon^3}} \geq \frac{\Delta_f}{\mathcal{E}}. \quad (149)$$

From [Lemma 15](#), during these time intervals the Hamiltonian will decrease in total at least  $N_{\tilde{\mathcal{T}}} \cdot \mathcal{E} = \Delta_f$ , which is impossible due to [Lemma 16](#), the Hamiltonian decreases monotonically for every step except for the  $\mathcal{T}'$  steps after uniform perturbation, and the overall decrease cannot be greater than  $\Delta_f$ , a contradiction. Therefore, we conclude that at least one of the iterations must be an  $\epsilon$ -approximate second-order stationary point, with probability at least  $1 - \delta$ .  $\square$

## D Proofs of the stochastic setting

### D.1 Proof details of negative curvature finding using stochastic gradients

In this subsection, we demonstrate that [Algorithm 3](#) can find a negative curvature efficiently. Specifically, we prove the following proposition:

**Proposition 22.** Suppose the function  $f: \mathbb{R}^n \rightarrow \mathbb{R}$  is  $\ell$ -smooth and  $\rho$ -Hessian Lipschitz. For any  $0 < \delta < 1$ , we specify our choice of parameters and constants we use as follows:

$$\mathcal{T}_s = \frac{8\ell}{\sqrt{\rho\epsilon}} \cdot \log\left(\frac{\ell n}{\delta\sqrt{\rho\epsilon}}\right), \quad \iota = 10 \log\left(\frac{n\mathcal{T}_s^2}{\delta} \log\left(\frac{\sqrt{n}}{\eta r_s}\right)\right), \quad (150)$$

$$r_s = \frac{\delta}{480\rho n\mathcal{T}_s} \sqrt{\frac{\rho\epsilon}{\iota}}, \quad m = \frac{160(\ell + \tilde{\ell})}{\delta\sqrt{\rho\epsilon}} \sqrt{\mathcal{T}_s\iota}, \quad (151)$$

Then for any point  $\tilde{\mathbf{x}} \in \mathbb{R}^n$  satisfying  $\lambda_{\min}(\mathcal{H}(\tilde{\mathbf{x}})) \leq -\sqrt{\rho\epsilon}$ , with probability at least  $1 - 3\delta$ , [Algorithm 3](#) outputs a unit vector  $\hat{\mathbf{e}}$  satisfying

$$\hat{\mathbf{e}}^T \mathcal{H}(\tilde{\mathbf{x}}) \hat{\mathbf{e}} \leq -\frac{\sqrt{\rho\epsilon}}{4}, \quad (152)$$

where  $\mathcal{H}$  stands for the Hessian matrix of function  $f$ , using  $O(m \cdot \mathcal{T}_s) = \tilde{O}\left(\frac{\log^2 n}{\delta \epsilon^{1/2}}\right)$  iterations.

Similarly to [Algorithm 1](#) and [Algorithm 2](#), the renormalization step [Line 6](#) in [Algorithm 3](#) only guarantees that the value  $\|\mathbf{y}_t\|$  would not scales exponentially during the algorithm, and does not affect the output. We thus introduce the following [Algorithm 7](#), which is the no-renormalization version of [Algorithm 3](#) that possess the same output and a simpler structure. Hence in this subsection, we analyze [Algorithm 7](#) instead of [Algorithm 3](#).

---

**Algorithm 7:** Stochastic Negative Curvature Finding without Renormalization( $\tilde{\mathbf{x}}, r_s, \mathcal{T}_s, m$ ).

---

```

1  $\mathbf{z}_0 \leftarrow \mathbf{0}$ ;
2 for  $t = 1, \dots, \mathcal{T}_s$  do
3   Sample  $\{\theta^{(1)}, \theta^{(2)}, \dots, \theta^{(m)}\} \sim \mathcal{D}$ ;
4    $\mathbf{g}(\mathbf{z}_{t-1}) \leftarrow \frac{\|\mathbf{z}_{t-1}\|}{r_s} \cdot \frac{1}{m} \sum_{j=1}^m \left( \mathbf{g}\left(\tilde{\mathbf{x}} + \frac{r_s}{\|\mathbf{z}_{t-1}\|} \mathbf{z}_{t-1}; \theta^{(j)}\right) - \mathbf{g}(\tilde{\mathbf{x}}; \theta^{(j)}) \right)$ ;
5    $\mathbf{z}_t \leftarrow \mathbf{z}_{t-1} - \frac{1}{\ell} (\mathbf{g}(\mathbf{z}_{t-1}) + \xi_t), \quad \xi_t \sim \mathcal{N}\left(0, \frac{r_s^2}{d} I\right)$ ;
6 Output  $\mathbf{z}_{\mathcal{T}} / \|\mathbf{z}_{\mathcal{T}}\|$ .
```

---

Without loss of generality, we assume  $\tilde{\mathbf{x}} = \mathbf{0}$  by shifting  $\mathbb{R}^n$  such that  $\tilde{\mathbf{x}}$  is mapped to  $\mathbf{0}$ . As argued in the proof of [Proposition 3](#),  $\mathcal{H}(\mathbf{0})$  admits the following eigen-decomposition:

$$\mathcal{H}(\mathbf{0}) = \sum_{i=1}^n \lambda_i \mathbf{u}_i \mathbf{u}_i^T, \quad (153)$$

where the set  $\{\mathbf{u}_i\}_{i=1}^n$  forms an orthonormal basis of  $\mathbb{R}^n$ . Without loss of generality, we assume the eigenvalues  $\lambda_1, \lambda_2, \dots, \lambda_n$  corresponding to  $\mathbf{u}_1, \mathbf{u}_2, \dots, \mathbf{u}_n$  satisfy

$$\lambda_1 \leq \lambda_2 \leq \dots \leq \lambda_n, \quad (154)$$

where  $\lambda_1 \leq -\sqrt{\rho\epsilon}$ . If  $\lambda_n \leq -\sqrt{\rho\epsilon}/2$ , [Proposition 22](#) holds directly. Hence, we only need to prove the case where  $\lambda_n > -\sqrt{\rho\epsilon}/2$ , where there exists some  $p, p'$  with

$$\lambda_p \leq -\sqrt{\rho\epsilon} < \lambda_{p+1}, \quad \lambda_{p'} \leq -\sqrt{\rho\epsilon}/2 < \lambda_{p'+1}. \quad (155)$$

**Notation:** Throughout this subsection, let  $\tilde{\mathcal{H}} := \mathcal{H}(\tilde{\mathbf{x}})$ . Use  $\mathfrak{S}_{\parallel}, \mathfrak{S}_{\perp}$  to separately denote the subspace of  $\mathbb{R}^n$  spanned by  $\{\mathbf{u}_1, \mathbf{u}_2, \dots, \mathbf{u}_p\}, \{\mathbf{u}_{p+1}, \mathbf{u}_{p+2}, \dots, \mathbf{u}_n\}$ , and use  $\mathfrak{S}'_{\parallel}, \mathfrak{S}'_{\perp}$  to denote the subspace of  $\mathbb{R}^n$  spanned by  $\{\mathbf{u}_1, \mathbf{u}_2, \dots, \mathbf{u}_{p'}\}, \{\mathbf{u}_{p'+1}, \mathbf{u}_{p'+2}, \dots, \mathbf{u}_n\}$ . Furthermore, define  $\mathbf{z}_{t,\parallel} := \sum_{i=1}^p \langle \mathbf{u}_i, \mathbf{z}_t \rangle \mathbf{u}_i$ ,  $\mathbf{z}_{t,\perp} := \sum_{i=p+1}^n \langle \mathbf{u}_i, \mathbf{z}_t \rangle \mathbf{u}_i$ ,  $\mathbf{z}_{t,\parallel'} := \sum_{i=1}^{p'} \langle \mathbf{u}_i, \mathbf{z}_t \rangle \mathbf{u}_i$ ,  $\mathbf{z}_{t,\perp'} := \sum_{i=p'+1}^n \langle \mathbf{u}_i, \mathbf{z}_t \rangle \mathbf{u}_i$  respectively to denote the component of  $\mathbf{z}_t$  in [Line 5](#) of [Algorithm 7](#) in the subspaces  $\mathfrak{S}_{\parallel}, \mathfrak{S}_{\perp}, \mathfrak{S}'_{\parallel}, \mathfrak{S}'_{\perp}$ , and let  $\gamma = -\lambda_1$ .

To prove [Proposition 22](#), we first introduce the following lemma:

**Lemma 23.** Under the setting of [Proposition 22](#), for any point  $\tilde{\mathbf{x}} \in \mathbb{R}^n$  satisfying  $\lambda_{\min}(\nabla^2 f(\tilde{\mathbf{x}})) \leq -\sqrt{\rho\epsilon}$ , with probability at least  $1 - 3\delta$ , [Algorithm 3](#) outputs a unit vector  $\hat{\mathbf{e}}$  satisfying

$$\|\hat{\mathbf{e}}_{\perp'}\| := \left\| \sum_{i=p'}^n \langle \mathbf{u}_i, \hat{\mathbf{e}} \rangle \mathbf{u}_i \right\| \leq \frac{\sqrt{\rho\epsilon}}{8\ell} \quad (156)$$

using  $O(m \cdot \mathcal{T}_s) = \tilde{O}\left(\frac{\log^2 n}{\delta \epsilon^{1/2}}\right)$  iterations.

### D.1.1 Proof of [Lemma 23](#)

In the proof of [Lemma 23](#), we consider the worst case, where  $\lambda_1 = -\gamma = -\sqrt{\rho\epsilon}$  is the only eigenvalue less than  $-\sqrt{\rho\epsilon}/2$ , and all other eigenvalues equal to  $-\sqrt{\rho\epsilon}/2 + \nu$  for an arbitrarily small constant  $\nu$ . Under this scenario, the component  $\mathbf{z}_{t,\perp'}$  is as small as possible at each time step.

The following lemma characterizes the dynamics of [Algorithm 7](#):

**Lemma 24.** Consider the sequence  $\{\mathbf{z}_i\}$  and let  $\eta = 1/\ell$ . Further, for any  $0 \leq t \leq \mathcal{T}_s$  we define

$$\zeta_t := \mathbf{g}(\mathbf{z}_{t-1}) - \frac{\|\mathbf{z}_t\|}{r_s} \left( \nabla f\left(\tilde{\mathbf{x}} + \frac{r_s}{\|\mathbf{z}_t\|} \mathbf{z}_t\right) - \nabla f(\tilde{\mathbf{x}}) \right), \quad (157)$$

to be the errors caused by the stochastic gradients. Then  $\mathbf{z}_t = -\mathbf{q}_h(t) - \mathbf{q}_{sg}(t) - \mathbf{q}_p(t)$ , where:

$$\mathbf{q}_h(t) := \eta \sum_{\tau=0}^{t-1} (I - \eta \tilde{\mathcal{H}})^{t-1-\tau} \Delta_\tau \hat{\mathbf{z}}_\tau, \quad (158)$$

for  $\Delta_\tau = \int_0^1 \mathcal{H}_f\left(\psi \frac{r_s}{\|\mathbf{z}_\tau\|} \mathbf{z}_\tau\right) d\psi - \tilde{\mathcal{H}}$ , and

$$\mathbf{q}_{sg}(t) := \eta \sum_{\tau=0}^{t-1} (I - \eta \tilde{\mathcal{H}})^{t-1-\tau} \zeta_\tau, \quad \mathbf{q}_p(t) := \eta \sum_{\tau=0}^{t-1} (I - \eta \tilde{\mathcal{H}})^{t-1-\tau} \xi_\tau. \quad (159)$$

*Proof.* Without loss of generality we assume  $\tilde{\mathbf{x}} = \mathbf{0}$ . The update formula for  $\mathbf{z}_t$  can be written as

$$\mathbf{z}_{t+1} = \mathbf{z}_t - \eta \left( \frac{\|\mathbf{z}_t\|}{r_s} \left( \nabla f\left(\frac{r_s}{\|\mathbf{z}_t\|} \mathbf{z}_t\right) - \nabla f(\mathbf{0}) \right) + \zeta_t + \xi_t \right), \quad (160)$$

where

$$\frac{\|\mathbf{z}_t\|}{r_s} \left( \nabla f\left(\frac{r_s}{\|\mathbf{z}_t\|} \mathbf{z}_t\right) - \nabla f(\mathbf{0}) \right) = \frac{\|\mathbf{z}_t\|}{r_s} \int_0^1 \mathcal{H}_f\left(\psi \frac{r_s}{\|\mathbf{z}_t\|} \mathbf{z}_t\right) \frac{r_s}{\|\mathbf{z}_t\|} \mathbf{z}_t d\psi = (\tilde{\mathcal{H}} + \Delta_t) \mathbf{z}_t, \quad (161)$$

indicating

$$\mathbf{z}_{t+1} = (I - \eta \tilde{\mathcal{H}}) \mathbf{z}_t - \eta (\Delta_t \mathbf{z}_t + \zeta_t + \xi_t) \quad (162)$$

$$= -\eta \sum_{\tau=0}^t (I - \eta \tilde{\mathcal{H}})^{t-\tau} (\Delta_t \mathbf{z}_t + \zeta_t + \xi_t), \quad (163)$$

which finishes the proof.  $\square$

At a high level, under our parameter choice in [Proposition 22](#),  $\mathbf{q}_p(t)$  is the dominating term controlling the dynamics, and  $\mathbf{q}_h(t) + \mathbf{q}_{sg}(t)$  will be small compared to  $\mathbf{q}_p(t)$ . Quantitatively, this is shown in the following lemma:

**Lemma 25.** Under the setting of [Proposition 22](#) while using the notation in [Lemma 12](#) and [Lemma 24](#), we have

$$\Pr \left( \|\mathbf{q}_h(t) + \mathbf{q}_{sg}(t)\| \leq \frac{\beta(t) \eta r_s \delta}{20\sqrt{n}} \cdot \frac{\sqrt{\rho\epsilon}}{16\ell}, \forall t \leq \mathcal{T}_s \right) \geq 1 - \delta, \quad (164)$$

where  $-\gamma := \lambda_{\min}(\tilde{\mathcal{H}}) = -\sqrt{\rho\epsilon}$ .

*Proof.* Divide  $\mathbf{q}_p(t)$  into two parts:

$$\mathbf{q}_{p,1}(t) := \langle \mathbf{q}_p(t), \mathbf{u}_1 \rangle \mathbf{u}_1, \quad (165)$$

and

$$\mathbf{q}_{p,\perp'}(t) := \mathbf{q}_p(t) - \mathbf{q}_{p,1}(t). \quad (166)$$

Then by [Lemma 13](#), we have

$$\Pr \left( \|\mathbf{q}_{p,1}(t)\| \leq \frac{\beta(t) \eta r_s}{\sqrt{n}} \cdot \sqrt{\ell} \right) \geq 1 - 2e^{-\ell}, \quad (167)$$

and

$$\Pr \left( \|\mathbf{q}_{p,1}(t)\| \geq \frac{\beta(t) \eta r_s}{20\sqrt{n}} \cdot \delta \right) \geq 1 - \delta/4. \quad (168)$$

Similarly,

$$\Pr \left( \|\mathbf{q}_{p,\perp'}(t)\| \leq \beta_{\perp'}(t) \eta r_s \cdot \sqrt{\ell} \right) \geq 1 - 2e^{-\ell}, \quad (169)$$

and

$$\Pr \left( \|\mathbf{q}_{p,\perp'}(t)\| \geq \frac{\beta_{\perp'}(t) \eta r_s}{20} \cdot \delta \right) \geq 1 - \delta/4, \quad (170)$$

where  $\beta_{\perp'}(t) := \frac{(1+\eta\gamma/2)^t}{\sqrt{\eta\gamma}}$ . Set  $t_{\perp'} := \frac{\log n}{\eta\gamma}$ . Then for all  $\tau \leq t_{\perp'}$ , we have

$$\frac{\beta(\tau)}{\beta_{\perp'}(\tau)} \leq \sqrt{n}, \quad (171)$$

which further leads to

$$\Pr \left( \|\mathbf{q}_{p,\perp'}(\tau)\| \leq 2\beta_{\perp'}(\tau)\eta r_s \cdot \sqrt{\iota} \right) \geq 1 - 2e^{-\iota}. \quad (172)$$

Next, we use induction to prove that the following inequality holds for all  $t \leq t_{\perp'}$ :

$$\Pr \left( \|\mathbf{q}_h(\tau) + \mathbf{q}_{sg}(\tau)\| \leq \beta_{\perp'}(\tau)\eta r_s \cdot \frac{\delta}{20}, \forall \tau \leq t \right) \geq 1 - 10nt^2 \log \left( \frac{\sqrt{n}}{\eta r_s} \right) e^{-\iota}. \quad (173)$$

For the base case  $t = 0$ , the claim holds trivially. Suppose it holds for all  $\tau \leq t$  for some  $t$ . Then due to [Lemma 13](#), with probability at least  $1 - 2t_{\perp'}e^{-\iota}$ , we have

$$\|\mathbf{z}_t\| \leq \eta\|\mathbf{q}_p(t)\| + \eta\|\mathbf{q}_h(t) + \mathbf{q}_{sg}(t)\| \leq 3\beta_{\perp'}(\tau)\eta r_s \cdot \sqrt{\iota}. \quad (174)$$

By the Hessian Lipschitz property,  $\Delta_\tau$  satisfies:

$$\|\Delta_\tau\| \leq \rho r_s. \quad (175)$$

Hence,

$$\|\mathbf{q}_h(t+1)\| \leq \left\| \eta \sum_{\tau=0}^t (I - \eta \tilde{\mathcal{H}})^{t-\tau} \Delta_\tau \mathbf{z}_\tau \right\| \quad (176)$$

$$\leq \eta \rho r_s \sum_{\tau=0}^t (I - \eta \tilde{\mathcal{H}})^{t-\tau} \|\mathbf{z}_\tau\| \quad (177)$$

$$\leq (\eta \rho r_s n \mathcal{T}_s) \cdot (3\beta_{\perp'}(t)\eta r_s) \cdot \sqrt{\iota} \quad (178)$$

$$\leq \frac{\beta_{\perp'}(t+1)\eta r_s}{10\sqrt{n}} \cdot \frac{\delta\sqrt{\rho\epsilon}}{16\ell}. \quad (179)$$

As for  $\mathbf{q}_{sg}(t)$ , note that  $\hat{\zeta}_\tau | \mathcal{F}_{\tau-1} \sim \text{nSG}((\ell + \tilde{\ell})\|\hat{\mathbf{z}}_\tau\|/\sqrt{m})$ . By applying [Lemma 14](#) with  $b = \alpha^2(t) \cdot \eta^2(\ell + \tilde{\ell})^2/m$  and  $b = \alpha^2(t)\eta^2(\ell + \tilde{\ell})^2\eta^2 r_s^2/(mn)$ , with probability at least

$$1 - 4n \cdot \log \left( \frac{\sqrt{n}}{\eta r_s} \right) \cdot e^{-\iota}, \quad (180)$$

we have

$$\|\mathbf{q}_{sg}(t+1)\| \leq \frac{\eta(\ell + \tilde{\ell})\sqrt{t}}{m} \cdot (\beta_{\perp'}(t)\eta r_s) \cdot \sqrt{\iota} \leq \frac{\beta_{\perp'}(t+1)\eta r_s}{20} \cdot \frac{\delta\sqrt{\rho\epsilon}}{8\ell}. \quad (181)$$

Then by union bound, with probability at least

$$1 - 10n(t+1)^2 \log \left( \frac{\sqrt{n}}{\eta r_s} \right) e^{-\iota}, \quad (182)$$

we have

$$\|\mathbf{q}_h(t+1) + \mathbf{q}_{sg}(t+1)\| \leq \beta_{\perp'}(t+1)\eta r_s \cdot \frac{\delta}{20} \cdot \frac{\sqrt{\rho\epsilon}}{8\ell}, \quad (183)$$

indicating that (173) holds. Then with probability at least

$$1 - 10nt_{\perp'}^2 \log \left( \frac{\sqrt{n}}{\eta r_s} \right) e^{-\iota} - \delta/4, \quad (184)$$

we have

$$\|\mathbf{q}_h(t_{\perp'}) + \mathbf{q}_{sg}(t_{\perp'})\| \leq \|\mathbf{q}_{p,1}(t_{\perp'})\| \cdot \frac{\sqrt{\rho\epsilon}}{16\ell}. \quad (185)$$

Based on this, we prove that the following inequality holds for any  $t_{\perp'} \leq t \leq \mathcal{T}_s$ :

$$\Pr \left( \|\mathbf{q}_h(\tau) + \mathbf{q}_{sg}(\tau)\| \leq \frac{\beta(\tau)\eta r_s}{20\sqrt{n}} \cdot \frac{\delta\sqrt{\rho\epsilon}}{16\ell}, \forall t_{\perp'} \leq \tau \leq t \right) \geq 1 - 10nt^2 \log \left( \frac{\sqrt{n}}{\eta r_s} \right) e^{-\iota}. \quad (186)$$

We still use recurrence to prove it. Note that its base case  $\tau = t_{\perp'}$  is guaranteed by (185). Suppose it holds for all  $\tau \leq t$  for some  $t$ . Then with probability at least  $1 - 2te^{-\iota}$ , we have

$$\|\mathbf{z}_t\| \leq \eta\|\mathbf{q}_p(t)\| + \eta\|\mathbf{q}_h(t) + \mathbf{q}_{sg}(t)\| \quad (187)$$

$$\leq 2\|\mathbf{q}_{p,1}(t)\| + \eta\|\mathbf{q}_h(t) + \mathbf{q}_{sg}(t)\| \quad (188)$$

$$\leq \frac{3\beta(\tau)\eta r_s}{\sqrt{n}} \cdot \sqrt{\iota}. \quad (189)$$

Then following a similar procedure as before, we can claim that

$$\|\mathbf{q}_h(t+1) + \mathbf{q}_{sg}(t+1)\| \leq \frac{\beta(t+1)\eta r_s}{\sqrt{n}} \cdot \frac{\delta}{20} \cdot \frac{\sqrt{\rho\epsilon}}{8\ell}, \quad (190)$$

holds with probability

$$1 - 10n(t+1)^2 \log\left(\frac{\sqrt{n}}{\eta r_s}\right) e^{-\iota} - \frac{\delta}{4}, \quad (191)$$

indicating that (186) holds. Then under our choice of parameters, the desired inequality

$$\|\mathbf{q}_h(t) + \mathbf{q}_{sg}(t)\| \leq \frac{\beta(t)\eta r_s \delta}{20\sqrt{n}} \cdot \frac{\sqrt{\rho\epsilon}}{16\ell} \quad (192)$$

holds with probability at least  $1 - \delta$ .  $\square$

Equipped with Lemma 25, we are now ready to prove Lemma 23.

*Proof.* First note that under our choice of  $\mathcal{T}_s$ , we have

$$\Pr\left(\frac{\|\mathbf{q}_{p,\perp'}(\mathcal{T}_s)\|}{\|\mathbf{q}_{p,1}(\mathcal{T}_s)\|} \leq \frac{\sqrt{\rho\epsilon}}{16\ell}\right) \geq 1 - \delta. \quad (193)$$

Further by Lemma 25 and union bound, with probability at least  $1 - 2\delta$ ,

$$\frac{\|\mathbf{q}_h(\mathcal{T}_s) + \mathbf{q}_{sg}(\mathcal{T}_s)\|}{\|\mathbf{q}_p(\mathcal{T}_s)\|} \leq \|\mathbf{q}_h(\mathcal{T}_s) + \mathbf{q}_{sg}(\mathcal{T}_s)\| \cdot \frac{20\sqrt{n}}{\delta\beta(t)\eta r_s} \leq \frac{\sqrt{\rho\epsilon}}{16\ell}. \quad (194)$$

For the output  $\hat{\mathbf{e}}$ , observe that its component  $\hat{\mathbf{e}}_{\perp'} = \hat{\mathbf{e}} - \hat{\mathbf{e}}_1$ , since  $\mathbf{u}_1$  is the only component in subspace  $\mathfrak{S}_{\parallel'}$ . Then with probability at least  $1 - 3\delta$ ,

$$\|\hat{\mathbf{e}}_{\perp'}\| \leq \sqrt{\rho\epsilon}/(8\ell). \quad (195)$$

$\square$

### D.1.2 Proof of Proposition 22

Based on Lemma 23, we present the proof of Proposition 22 as follows:

*Proof.* By Lemma 23, the component  $\hat{\mathbf{e}}_{\perp'}$  of output  $\mathbf{e}$  satisfies

$$\|\hat{\mathbf{e}}_{\perp'}\| \leq \frac{\sqrt{\rho\epsilon}}{8\ell}. \quad (196)$$

Since  $\hat{\mathbf{e}} = \hat{\mathbf{e}}_{\parallel'} + \hat{\mathbf{e}}_{\perp'}$ , we can derive that

$$\|\hat{\mathbf{e}}_{\parallel'}\| \geq \sqrt{1 - \frac{\rho\epsilon}{(8\ell)^2}} \geq 1 - \frac{\rho\epsilon}{(8\ell)^2}. \quad (197)$$

Note that

$$\hat{\mathbf{e}}^T \tilde{\mathcal{H}} \hat{\mathbf{e}} = (\hat{\mathbf{e}}_{\perp'} + \hat{\mathbf{e}}_{\parallel'})^T \tilde{\mathcal{H}} (\hat{\mathbf{e}}_{\perp'} + \hat{\mathbf{e}}_{\parallel'}), \quad (198)$$

which can be further simplified to

$$\hat{\mathbf{e}}^T \tilde{\mathcal{H}} \hat{\mathbf{e}} = \hat{\mathbf{e}}_{\perp'}^T \tilde{\mathcal{H}} \hat{\mathbf{e}}_{\perp'} + \hat{\mathbf{e}}_{\parallel'}^T \tilde{\mathcal{H}} \hat{\mathbf{e}}_{\parallel'}. \quad (199)$$

Due to the  $\ell$ -smoothness of the function, all eigenvalue of the Hessian matrix has its absolute value upper bounded by  $\ell$ . Hence,

$$\hat{\mathbf{e}}_{\perp'}^T \tilde{\mathcal{H}} \hat{\mathbf{e}}_{\perp'} \leq \ell \|\hat{\mathbf{e}}_{\perp'}\|_2^2 = \frac{\rho\epsilon}{64\ell^2}, \quad (200)$$

whereas

$$\hat{\mathbf{e}}_{\parallel'}^T \tilde{\mathcal{H}} \hat{\mathbf{e}}_{\parallel'} \leq -\frac{\sqrt{\rho\epsilon}}{2} \|\hat{\mathbf{e}}_{\parallel'}\|^2. \quad (201)$$

Combining these two inequalities together, we can obtain

$$\hat{\mathbf{e}}^T \tilde{\mathcal{H}} \hat{\mathbf{e}} = \hat{\mathbf{e}}_{\perp'}^T \tilde{\mathcal{H}} \hat{\mathbf{e}}_{\perp'} + \hat{\mathbf{e}}_{\parallel'}^T \tilde{\mathcal{H}} \hat{\mathbf{e}}_{\parallel'} \leq -\frac{\sqrt{\rho\epsilon}}{2} \|\hat{\mathbf{e}}_{\parallel'}\|^2 + \frac{\rho\epsilon}{64\ell^2} \leq -\frac{\sqrt{\rho\epsilon}}{4}. \quad (202)$$

$\square$

---

**Algorithm 8:** Stochastic Gradient Descent with Negative Curvature Finding.

---

```

1 Input:  $\mathbf{x}_0 \in \mathbb{R}^n$ ;
2 for  $t = 0, 1, \dots, T$  do
3   Sample  $\{\theta^{(1)}, \theta^{(2)}, \dots, \theta^{(M)}\} \sim \mathcal{D}$ ;
4    $\mathbf{g}(\mathbf{x}_t) = \frac{1}{M} \sum_{j=1}^M \mathbf{g}(\mathbf{x}_t; \theta^{(j)})$ ;
5   if  $\|\mathbf{g}(\mathbf{x}_t)\| \leq 3\epsilon/4$  then
6      $\hat{\mathbf{e}} \leftarrow \text{StochasticNegativeCurvatureFinding}(\mathbf{x}_t, r_s, \mathcal{T}_s, m)$ ;
7      $\mathbf{x}_t \leftarrow \mathbf{x}_t - \frac{f'_\delta(\mathbf{x}_0)}{4\|f'_\delta(\mathbf{x}_0)\|} \sqrt{\frac{\epsilon}{\rho}} \cdot \hat{\mathbf{e}}$ ;
8     Sample  $\{\theta^{(1)}, \theta^{(2)}, \dots, \theta^{(M)}\} \sim \mathcal{D}$ ;
9      $\mathbf{g}(\mathbf{x}_t) = \frac{1}{M} \sum_{j=1}^M \mathbf{g}(\mathbf{x}_t; \theta^{(j)})$ ;
10   $\mathbf{x}_{t+1} \leftarrow \mathbf{x}_t - \frac{1}{\ell} \mathbf{g}(\mathbf{x}_t; \theta_t)$ ;

```

---

## D.2 Proof details of escaping saddle points using Algorithm 3

In this subsection, we demonstrate that Algorithm 3 can be used to escape from saddle points in the stochastic setting. We first present the explicit Algorithm 8, and then introduce the full version Theorem 9 with proof.

**Theorem 26** (Full version of Theorem 9). *Suppose that the function  $f$  is  $\ell$ -smooth and  $\rho$ -Hessian Lipschitz. For any  $\epsilon > 0$  and a constant  $0 < \delta_s \leq 1$ , we choose the parameters appearing in Algorithm 8 as*

$$\delta = \frac{\delta_s}{2304\Delta_f} \sqrt{\frac{\epsilon^3}{\rho}}, \quad \mathcal{T}_s = \frac{8\ell}{\sqrt{\rho\epsilon}} \cdot \log\left(\frac{\ell n}{\delta\sqrt{\rho\epsilon}}\right), \quad \iota = 10 \log\left(\frac{n\mathcal{T}_s^2}{\delta} \log\left(\frac{\sqrt{n}}{\eta r_s}\right)\right), \quad (203)$$

$$r_s = \frac{\delta}{480\rho n\mathcal{T}_s} \sqrt{\frac{\rho\epsilon}{\iota}}, \quad m = \frac{160(\ell + \tilde{\ell})}{\delta\sqrt{\rho\epsilon}} \sqrt{\mathcal{T}_s\iota}, \quad M = \frac{16\ell\Delta_f}{\epsilon^2} \quad (204)$$

where  $\Delta_f := f(\mathbf{x}_0) - f^*$  and  $f^*$  is the global minimum of  $f$ . Then, Algorithm 8 satisfies that at least  $1/4$  of the iterations  $\mathbf{x}_t$  will be  $\epsilon$ -approximate second-order stationary points, using

$$\tilde{O}\left(\frac{(f(\mathbf{x}_0) - f^*)}{\epsilon^4} \cdot \log^2 n\right) \quad (205)$$

iterations, with probability at least  $1 - \delta_s$ .

*Proof.* Let the parameters be chosen according to (2), and set the total step number  $T$  to be:

$$T = \max\left\{\frac{8\ell(f(\mathbf{x}_0) - f^*)}{\epsilon^2}, 768(f(\mathbf{x}_0) - f^*) \cdot \sqrt{\frac{\rho}{\epsilon^3}}\right\}. \quad (206)$$

We will show that the following two claims hold simultaneously with probability  $1 - \delta_s$ :

1. At most  $T/4$  steps have gradients larger than  $\epsilon$ ;
2. Algorithm 3 can be called for at most  $384\Delta_f \sqrt{\frac{\rho}{\epsilon^3}}$  times.

Therefore, at least  $T/4$  steps are  $\epsilon$ -approximate secondary stationary points. We prove the two claims separately.

**Claim 1.** Suppose that within  $T$  steps, we have more than  $T/4$  steps with gradients larger than  $\epsilon$ . Then with probability  $1 - \delta_s/2$ ,

$$f(\mathbf{x}_T) - f(\mathbf{x}_0) \leq -\frac{\eta}{8} \sum_{i=0}^{T-1} \|\nabla f(\mathbf{x}_i)\|^2 + c \cdot \frac{\sigma^2}{M\ell} (T + \log(1/\delta_s)) \leq f^* - f(\mathbf{x}_0), \quad (207)$$

contradiction.

**Claim 2.** We first assume that for each  $\mathbf{x}_t$  we apply negative curvature finding (Algorithm 3), we can successfully obtain a unit vector  $\hat{\mathbf{e}}$  with  $\hat{\mathbf{e}}^T \mathcal{H}(\mathbf{x}_t) \hat{\mathbf{e}} \leq -\sqrt{\rho\epsilon}/4$ , as long as  $\lambda_{\min}(\mathcal{H}(\mathbf{x}_t)) \leq -\sqrt{\rho\epsilon}$ . The error probability of this assumption is provided later.

Under this assumption, [Algorithm 3](#) can be called for at most  $384(f(\mathbf{x}_0) - f^*)\sqrt{\frac{\rho}{\epsilon^3}} \leq \frac{T}{2}$  times, for otherwise the function value decrease will be greater than  $f(\mathbf{x}_0) - f^*$ , which is not possible. Then, the error probability that some calls to [Algorithm 3](#) fails is upper bounded by

$$384(f(\mathbf{x}_0) - f^*)\sqrt{\frac{\rho}{\epsilon^3}} \cdot (3\delta) = \delta_s/2. \quad (208)$$

The number of iterations can be viewed as the sum of two parts, the number of iterations needed in large gradient scenario, denoted by  $T_1$ , and the number of iterations needed for negative curvature finding, denoted by  $T_2$ . With probability at least  $1 - \delta_s$ ,

$$T_1 = O(M \cdot T) = \tilde{O}\left(\frac{(f(\mathbf{x}_0) - f^*)}{\epsilon^4}\right). \quad (209)$$

As for  $T_2$ , with probability at least  $1 - \delta_s$ , [Algorithm 3](#) is called for at most  $384(f(\mathbf{x}_0) - f^*)\sqrt{\frac{\rho}{\epsilon^3}}$  times, and by [Proposition 22](#) it takes  $\tilde{O}\left(\frac{\log^2 n}{\delta\sqrt{\rho\epsilon}}\right)$  iterations each time. Hence,

$$T_2 = 384(f(\mathbf{x}_0) - f^*)\sqrt{\frac{\rho}{\epsilon^3}} \cdot \tilde{O}\left(\frac{\log^2 n}{\delta\sqrt{\rho\epsilon}}\right) = \tilde{O}\left(\frac{(f(\mathbf{x}_0) - f^*)}{\epsilon^4} \cdot \log^2 n\right). \quad (210)$$

As a result, the total iteration number  $T_1 + T_2$  is

$$\tilde{O}\left(\frac{(f(\mathbf{x}_0) - f^*)}{\epsilon^4} \cdot \log^2 n\right). \quad (211)$$

□

## E More numerical experiments

In this section, we present more numerical experiment results that support our theoretical claims from a few different perspectives compared to [Section 4](#). Specifically, considering that previous experiments all lies in a two-dimensional space, and theoretically our algorithms have a better dependence on the dimension of the problem  $n$ , it is reasonable to check the actual performance of our algorithm on high-dimensional test functions, which is presented in [Appendix E.1](#). Then in [Appendix E.2](#), we introduce experiments on various landscapes that demonstrate the advantage of [Algorithm 2](#) over PAGD [\[22\]](#). Moreover, we compare the performance of our [Algorithm 2](#) with the NEON<sup>+</sup> algorithm [\[30\]](#) on a few test functions in [Appendix E.3](#). To be more precise, we compare the negative curvature extracting part of NEON<sup>+</sup> with [Algorithm 2](#) at saddle points in different types of nonconvex landscapes.

### E.1 Dimension dependence

Recall that  $n$  is the dimension of the problem. We choose a test function  $h(x) = \frac{1}{2}x^T \mathcal{H}x + \frac{1}{16}x_1^4$  where  $\mathcal{H}$  is an  $n$ -by- $n$  diagonal matrix:  $\mathcal{H} = \text{diag}(-\epsilon, 1, 1, \dots, 1)$ . The function  $h(x)$  has a saddle point at the origin, and only one negative curvature direction. Throughout the experiment, we set  $\epsilon = 1$ . For the sake of comparison, the iteration numbers are chosen in a manner such that the statistics of [Algorithm 1](#) and PGD in each category of the histogram are of similar magnitude.

### E.2 Comparison between [Algorithm 2](#) and PAGD on various nonconvex landscapes

**Quartic-type test function** Consider the test function  $f(x_1, x_2) = \frac{1}{16}x_1^4 - \frac{1}{2}x_1^2 + \frac{9}{8}x_2^2$  with a saddle point at  $(0, 0)$ . The advantage of [Algorithm 2](#) is illustrated in [Figure 4](#).

**Triangle-type test function.** Consider the test function  $f(x_1, x_2) = \frac{1}{2}\cos(\pi x_1) + \frac{1}{2}\left(x_2 + \frac{\cos(2\pi x_1) - 1}{2}\right)^2 - \frac{1}{2}$  with a saddle point at  $(0, 0)$ . The advantage of [Algorithm 2](#) is illustrated in [Figure 5](#).

**Exponential-type test function.** Consider the test function  $f(x_1, x_2) = \frac{1}{1+e^{x_1}} + \frac{1}{2}(x_2 - x_1^2 e^{-x_1^2})^2 - 1$  with a saddle point at  $(0, 0)$ . The advantage of [Algorithm 2](#) is illustrated in [Figure 6](#).



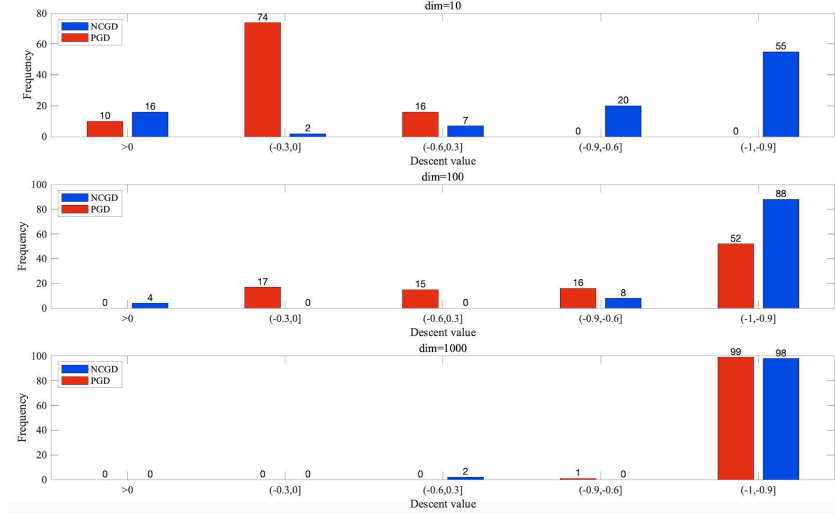

Figure 3: Dimension dependence of Algorithm 1 and PGD. We set  $\epsilon = 0.01$ ,  $r = 0.1$ ,  $n = 10^p$  for  $p = 1, 2, 3$ . The iteration number of Algorithm 1 and PGD are separately set to be  $30p$  and  $20p^2 + 10$ , and the sample size  $M = 100$ . As we can see, to maintain the same performance, the number of iterations in PGD grows faster than the number of iterations in Algorithm 1.

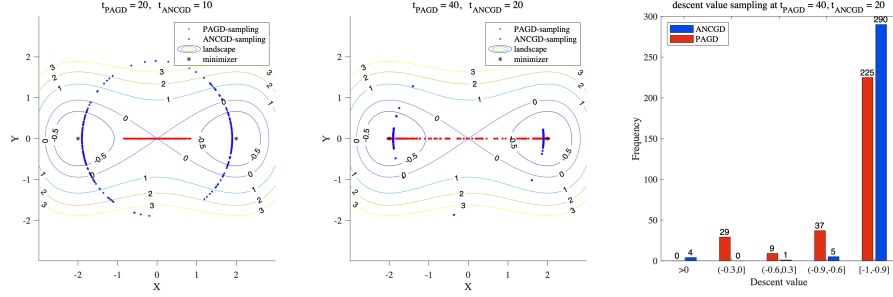

Figure 4: Run Algorithm 2 and PAGD on landscape  $f(x_1, x_2) = \frac{1}{16}x_1^4 - \frac{1}{2}x_1^2 + \frac{9}{8}x_2^2$ . Parameters:  $\eta = 0.05$  (step length),  $r = 0.08$  (ball radius in PAGD and parameter  $r$  in Algorithm 2),  $M = 300$  (number of samplings).

**Left:** The contour of the landscape is placed on the background with labels being function values. Blue points represent samplings of Algorithm 2 at time step  $t_{\text{ANCGD}} = 10$  and  $t_{\text{ANCGD}} = 20$ , and red points represent samplings of PAGD at time step  $t_{\text{PAGD}} = 20$  and  $t_{\text{PAGD}} = 40$ . Similarly to Algorithm 1, Algorithm 2 transforms an initial uniform-circle distribution into a distribution concentrating on two points indicating negative curvature, and these two figures represent intermediate states of this process. It converges faster than PAGD even when  $t_{\text{ANCGD}} \ll t_{\text{PAGD}}$ .

**Right:** A histogram of descent values obtained by Algorithm 2 and PAGD, respectively. Set  $t_{\text{ANCGD}} = 20$  and  $t_{\text{PAGD}} = 40$ . Although we run two times of iterations in PAGD, there are still over 20% of PAGD paths with function value decrease no greater than 0.9, while this ratio for Algorithm 2 is less than 5%.

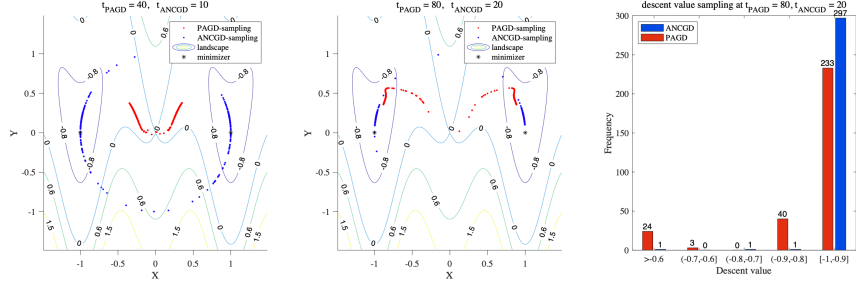

Figure 5: Run [Algorithm 2](#) and PAGD on landscape  $f(x_1, x_2) = \frac{1}{2} \cos(\pi x_1) + \frac{1}{2} \left( x_2 + \frac{\cos(2\pi x_1) - 1}{2} \right)^2 - \frac{1}{2}$ . Parameters:  $\eta = 0.01$  (step length),  $r = 0.1$  (ball radius in PAGD and parameter  $r$  in [Algorithm 2](#)),  $M = 300$  (number of samplings).

**Left:** The contour of the landscape is placed on the background with labels being function values. Blue points represent samplings of [Algorithm 2](#) at time step  $t_{\text{ANCGD}} = 10$  and  $t_{\text{ANCGD}} = 20$ , and red points represent samplings of PAGD at time step  $t_{\text{PAGD}} = 40$  and  $t_{\text{PAGD}} = 80$ . [Algorithm 2](#) converges faster than PAGD even when  $t_{\text{ANCGD}} \ll t_{\text{PAGD}}$ .

**Right:** A histogram of descent values obtained by [Algorithm 2](#) and PAGD, respectively. Set  $t_{\text{ANCGD}} = 20$  and  $t_{\text{PAGD}} = 80$ . Although we run four times of iterations in PAGD, there are still over 20% of gradient descent paths with function value decrease not greater than 0.9, while this ratio for [Algorithm 2](#) is less than 5%.

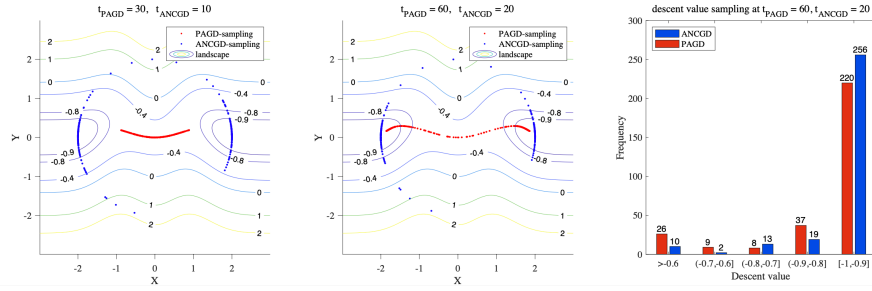

Figure 6: Run [Algorithm 2](#) and PAGD on landscape  $f(x_1, x_2) = \frac{1}{1+e^{x_1^2}} + \frac{1}{2} (x_2 - x_1^2 e^{-x_1^2})^2 - 1$ . Parameters:  $\eta = 0.03$  (step length),  $r = 0.1$  (ball radius in PAGD and parameter  $r$  in [Algorithm 2](#)),  $M = 300$  (number of samplings).

**Left:** The contour of the landscape is placed on the background with labels being function values. Blue points represent samplings of [Algorithm 2](#) at time step  $t_{\text{ANCGD}} = 10$  and  $t_{\text{ANCGD}} = 20$ , and red points represent samplings of PAGD at time step  $t_{\text{PAGD}} = 30$  and  $t_{\text{PAGD}} = 60$ . [Algorithm 2](#) converges faster than PAGD even when  $t_{\text{ANCGD}} \ll t_{\text{PAGD}}$ .

**Right:** A histogram of descent values obtained by [Algorithm 2](#) and PAGD, respectively. Set  $t_{\text{ANCGD}} = 20$  and  $t_{\text{PAGD}} = 60$ . Although we run three times of iterations in PAGD, its performance is still dominated by our [Algorithm 2](#).

Compared to the previous experiment on [Algorithm 1](#) and PGD shown as [Figure 1](#) in [Section 4](#), these experiments also demonstrate the faster convergence rates enjoyed by the general family of "momentum methods". Specifically, using fewer iterations, [Algorithm 2](#) and PAGD achieve larger function value decreases separately compared to [Algorithm 1](#) and PGD.

### E.3 Comparison between [Algorithm 2](#) and NEON<sup>+</sup> on various nonconvex landscapes

**Triangle-type test function.** Consider the test function  $f(x_1, x_2) = \frac{1}{2} \cos(\pi x_1) + \frac{1}{2} \left( x_2 + \frac{\cos(2\pi x_1) - 1}{2} \right)^2 - \frac{1}{2}$  with a saddle point at  $(0, 0)$ . The advantage of [Algorithm 2](#) is illustrated in [Figure 7](#).

**Exponential-type test function.** Consider the test function  $f(x_1, x_2) = \frac{1}{1+e^{x_1^2}} + \frac{1}{2} (x_2 - x_1^2 e^{-x_1^2})^2 - 1$  with a saddle point at  $(0, 0)$ . The advantage of [Algorithm 2](#) is illustrated in [Figure 8](#).

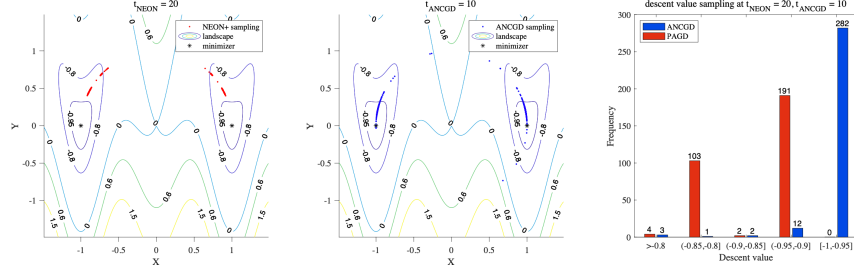

Figure 7: Run [Algorithm 2](#) and  $\text{NEON}^+$  on landscape  $f(x_1, x_2) = \frac{1}{2} \cos(\pi x_1) + \frac{1}{2} \left( x_2 + \frac{\cos(2\pi x_1) - 1}{2} \right)^2 - \frac{1}{2}$ . Parameters:  $\eta = 0.04$  (step length),  $r = 0.1$  (ball radius in  $\text{NEON}^+$  and parameter  $r$  in [Algorithm 2](#)),  $M = 300$  (number of samplings).

**Left:** The contour of the landscape is placed on the background with labels being function values. Red points represent samplings of  $\text{NEON}^+$  at time step  $t_{\text{NEON}} = 20$ , and blue points represent samplings of [Algorithm 2](#) at time step  $t_{\text{ANCGD}} = 10$ . [Algorithm 2](#) and the negative curvature extracting part of  $\text{NEON}^+$  both transform an initial uniform-circle distribution into a distribution concentrating on two points indicating negative curvature. Note that [Algorithm 2](#) converges faster than  $\text{NEON}^+$  even when  $t_{\text{ANCGD}} \ll t_{\text{NEON}}$ .

**Right:** A histogram of descent values obtained by [Algorithm 2](#) and  $\text{NEON}^+$ , respectively. Set  $t_{\text{ANCGD}} = 10$  and  $t_{\text{NEON}} = 20$ . Although we run two times of iterations in  $\text{NEON}^+$ , none of  $\text{NEON}^+$  paths has function value decrease greater than 0.95, while this ratio for [Algorithm 2](#) is larger than 90%.

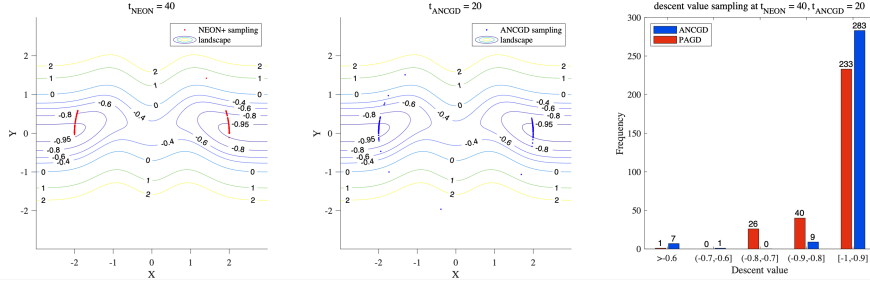

Figure 8: Run [Algorithm 2](#) and  $\text{NEON}^+$  on landscape  $f(x_1, x_2) = \frac{1}{1+e^{x_1}} + \frac{1}{2} (x_2 - x_1^2 e^{-x_1})^2 - 1$ . Parameters:  $\eta = 0.03$  (step length),  $r = 0.1$  (ball radius in  $\text{NEON}^+$  and parameter  $r$  in [Algorithm 2](#)),  $M = 300$  (number of samplings).

**Left:** The contour of the landscape is placed on the background with labels being function values. Red points represent samplings of  $\text{NEON}^+$  at time step  $t_{\text{NEON}} = 40$ , and blue points represent samplings of [Algorithm 2](#) at time step  $t_{\text{ANCGD}} = 20$ . [Algorithm 2](#) converges faster than  $\text{NEON}^+$  even when  $t_{\text{ANCGD}} \ll t_{\text{NEON}}$ .

**Right:** A histogram of descent values obtained by [Algorithm 2](#) and  $\text{NEON}^+$ , respectively. Set  $t_{\text{ANCGD}} = 20$  and  $t_{\text{NEON}} = 40$ . Although we run two times of iterations in  $\text{NEON}^+$ , there are still over 20% of  $\text{NEON}^+$  paths with function value decrease no greater than 0.9, while this ratio for [Algorithm 2](#) is less than 10%.

Compared to the previous experiments on [Algorithm 2](#) and PAGD in [Appendix E.2](#), these two experiments also reveal the faster convergence rate of both  $\text{NEON}^+$  and [Algorithm 2](#) against PAGD [22] at small gradient regions.
